# Supplementary material for: Novel NHC-based Pd–PEPPSI complexes: synthesis, structural characterization by X-ray diffraction, biological properties, and catalytic performance in N-alkylation reactions
Source: Royal Society of Chemistry journal article supplement (doi:10.1039/d6ra00146g), 2026-04-13
Supplement: d6ra00146g1.pdf [file d6ra00146g1.pdf]

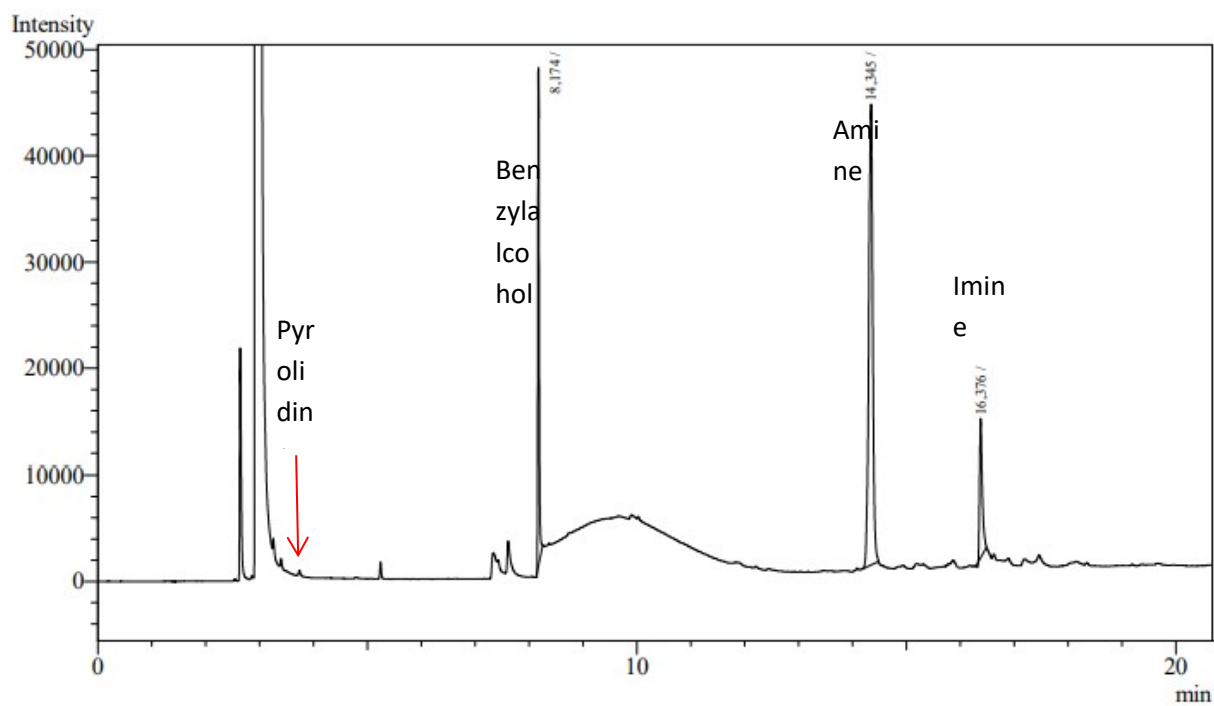

**Figure S1** : Chromatogram for N-alkylation (pyrrolidine – benzylalcohol) catalysed by **3a**

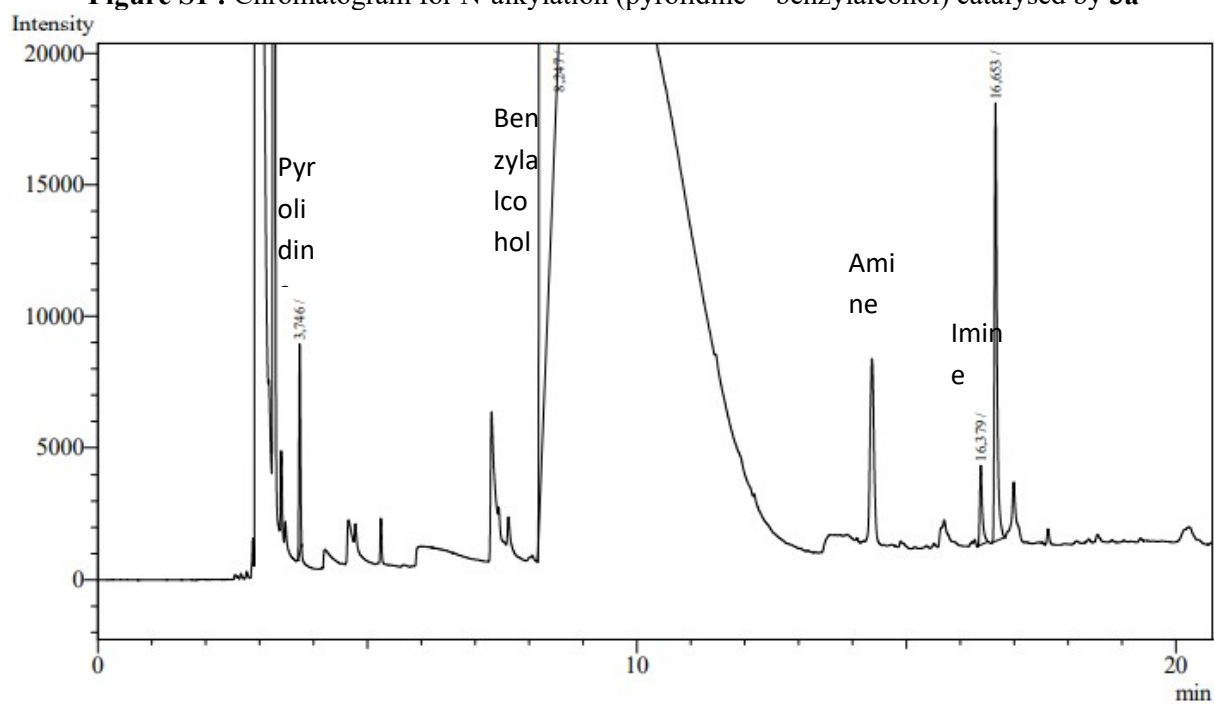

**Figure S2** : Chromatogram for N-alkylation (pyrrolidine – benzylalcohol) catalysed by **3b**

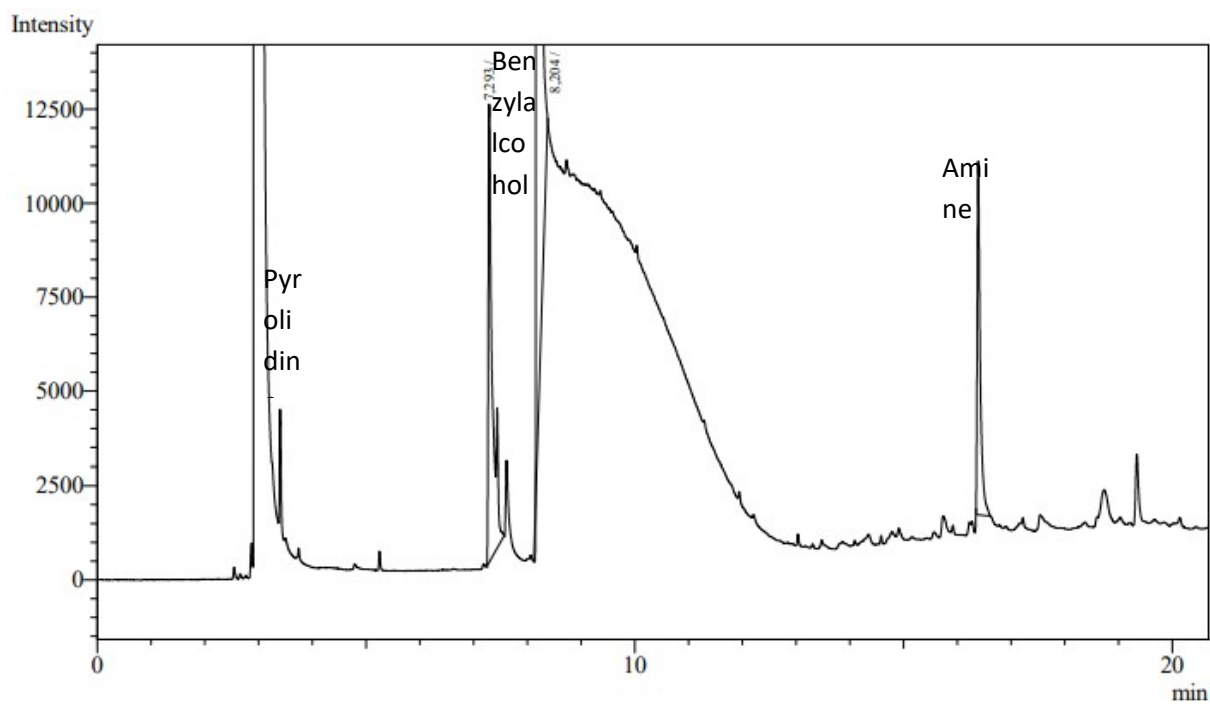

**Figure S3 :** Chromatogram for N-alkylation (pyrrolidine – benzylalcohol) catalysed by **3c**

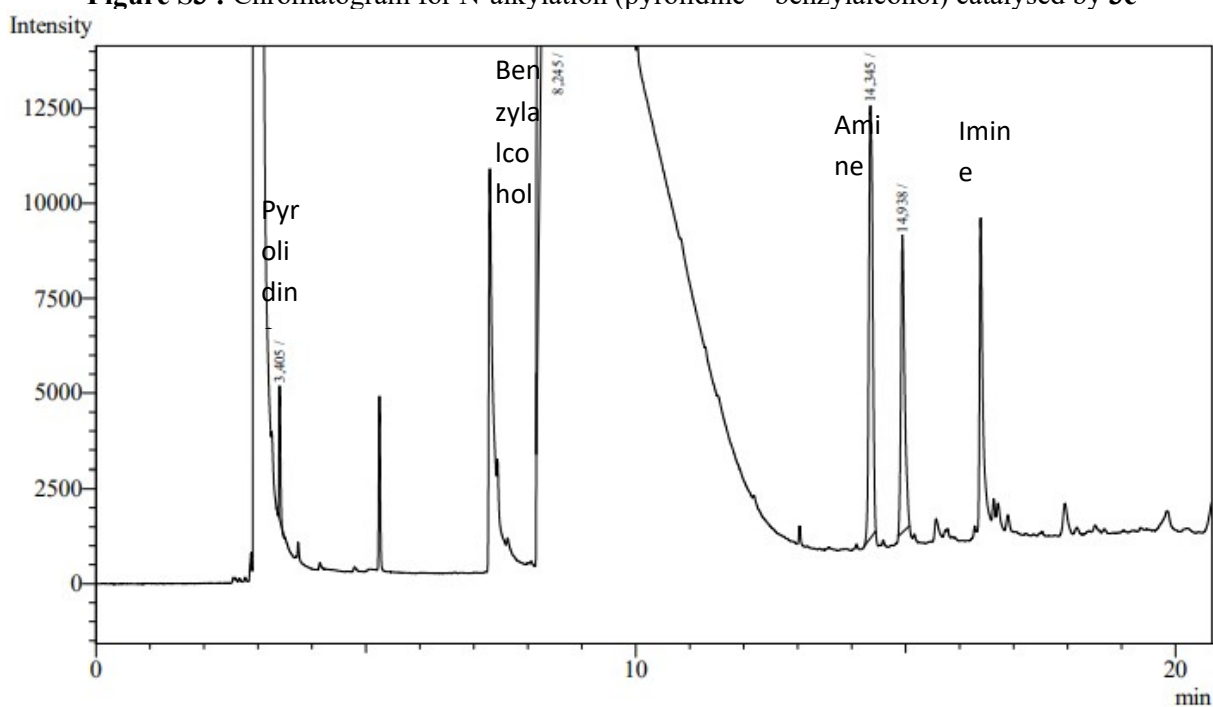

**Figure S4 :** Chromatogram for N-alkylation (pyrrolidine – benzylalcohol) catalysed by **3d**

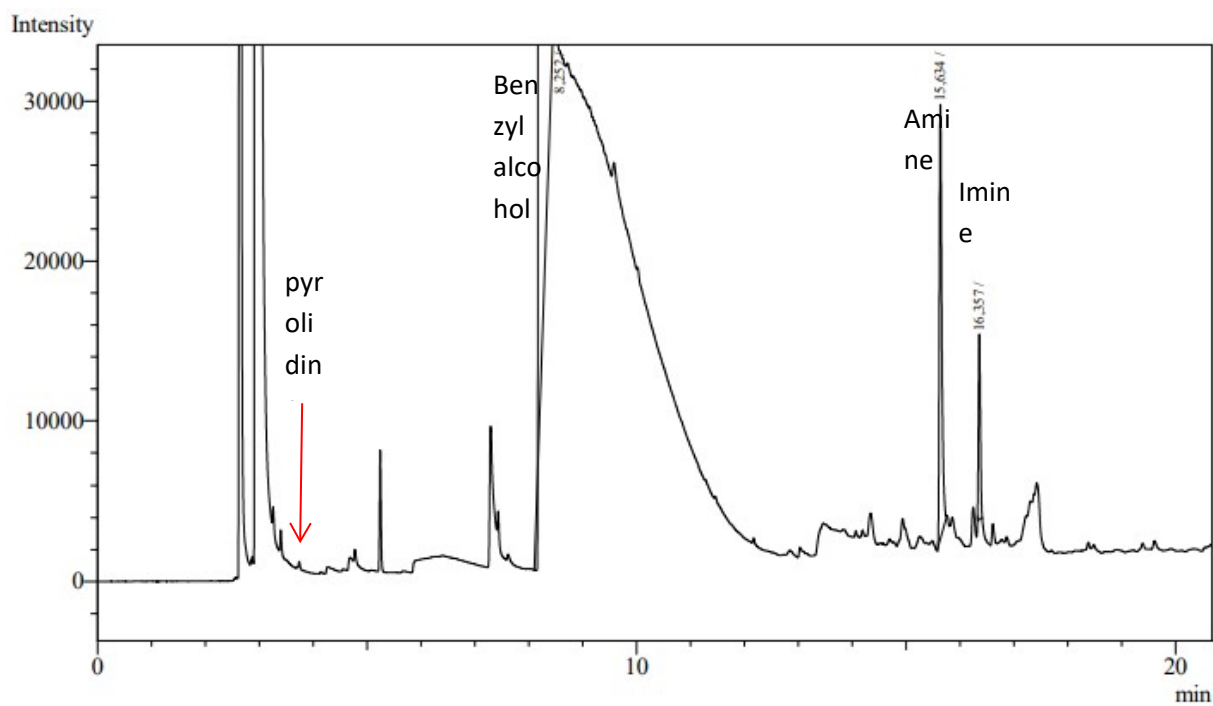

**Figure S5 :** Chromatogram for N-alkylation (pyrrolidine – benzylalcohol) catalysed by **3e**

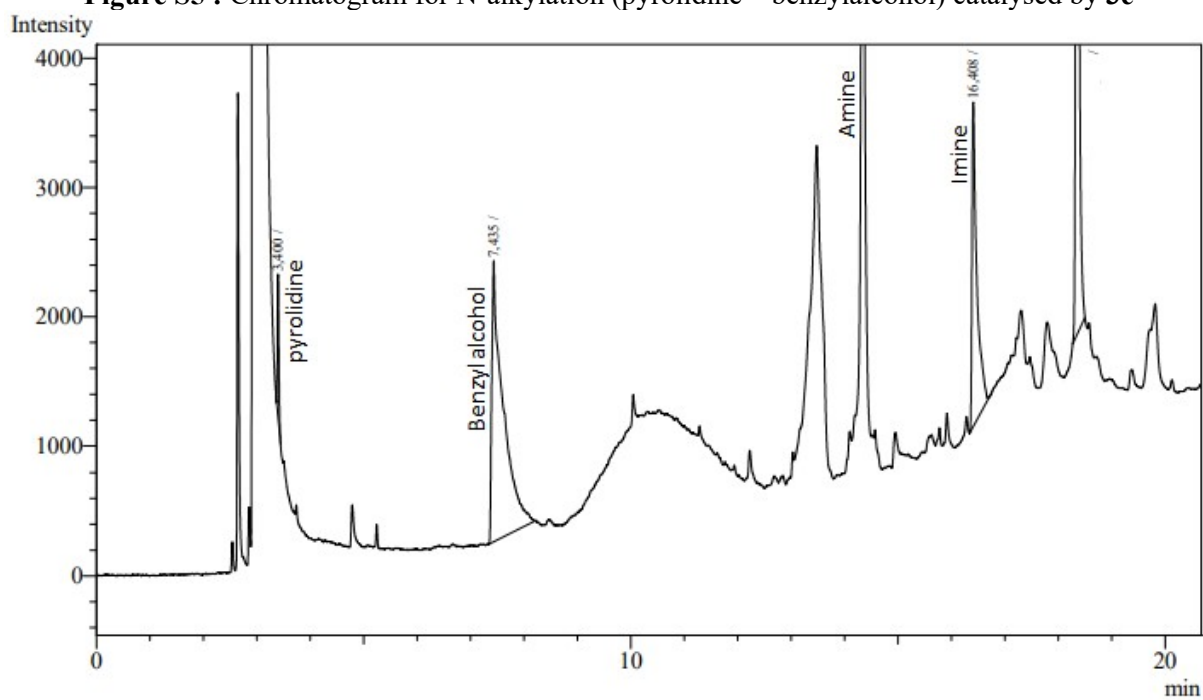

**Figure S6 :** Chromatogram for N-alkylation (pyrrolidine – benzylalcohol) catalysed by **3f**

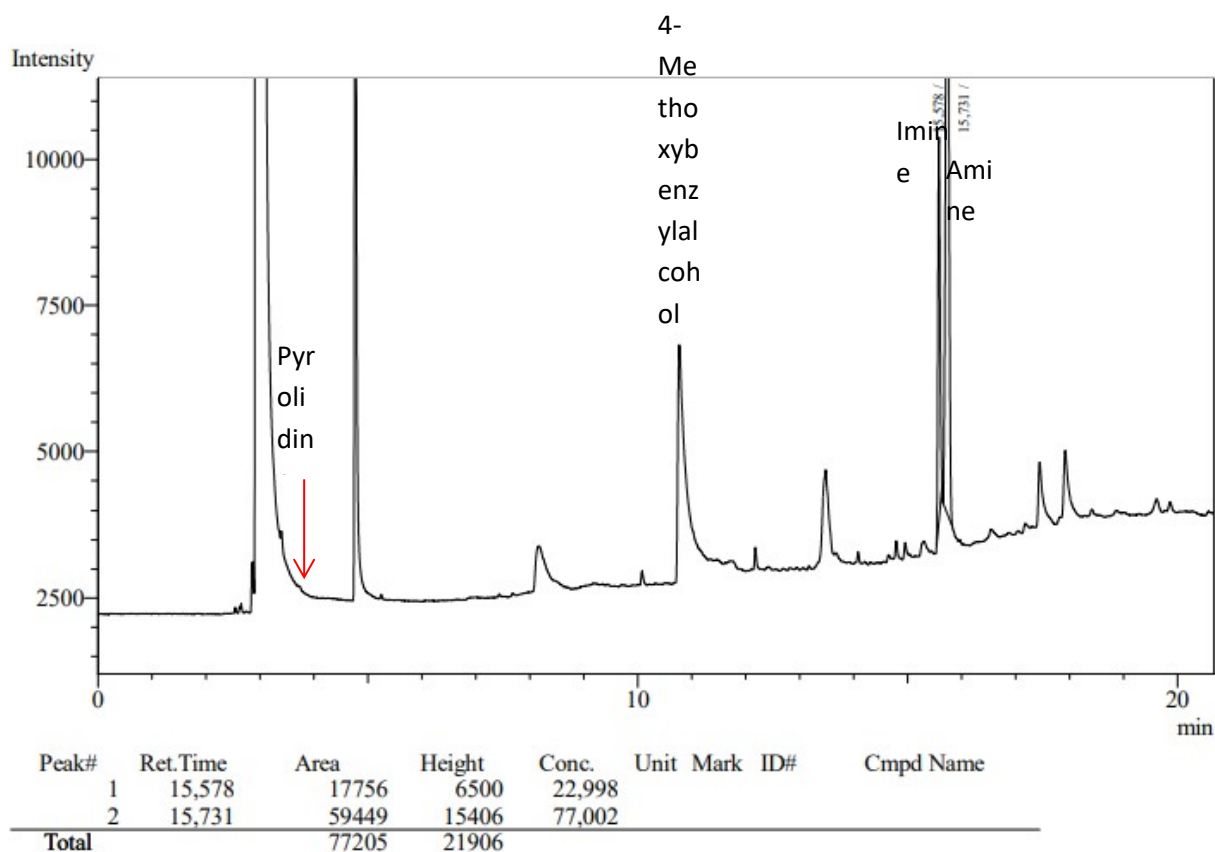

**Figure S7** : Chromatogram for N-alkylation (pyrolidine – 4-methoxybenzylalcohol) catalysed by **3a**

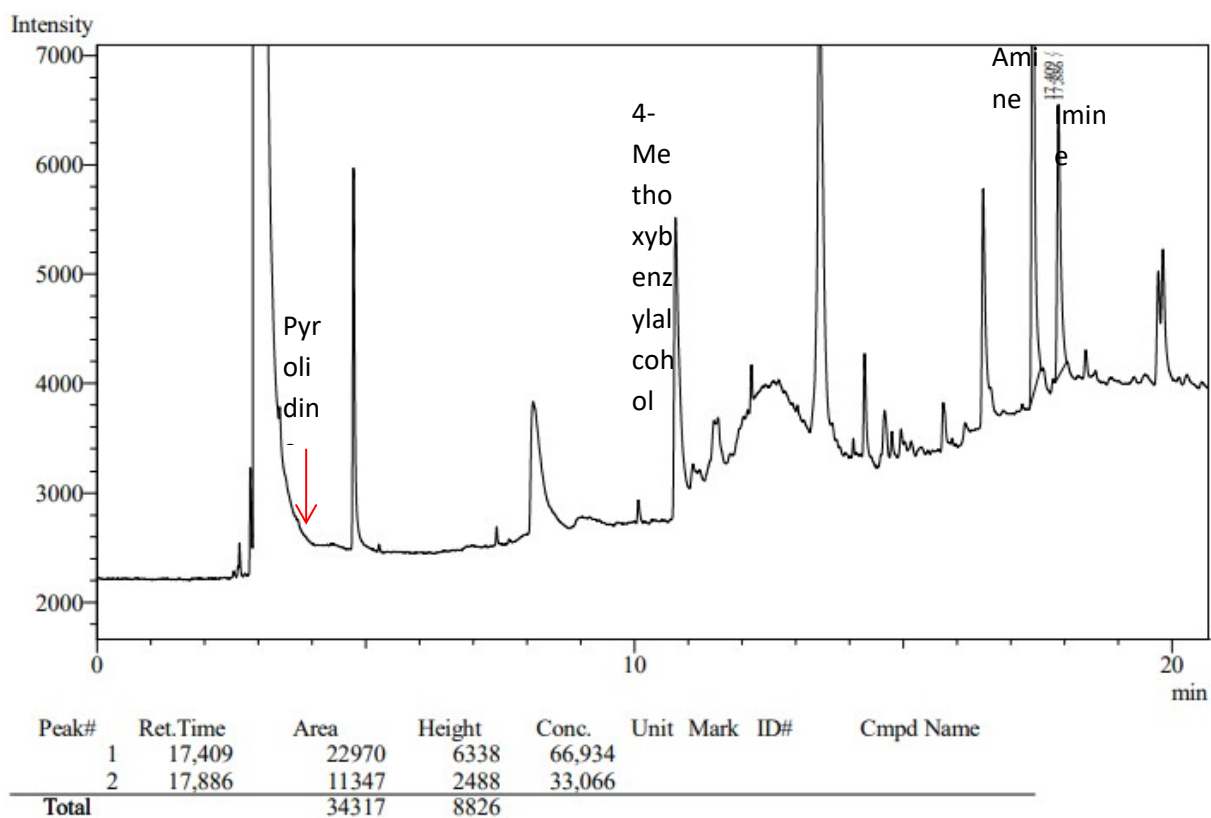

**Figure S8** : Chromatogram for N-alkylation (pyrolidine – 4-methoxybenzylalcohol) catalysed by **3b**

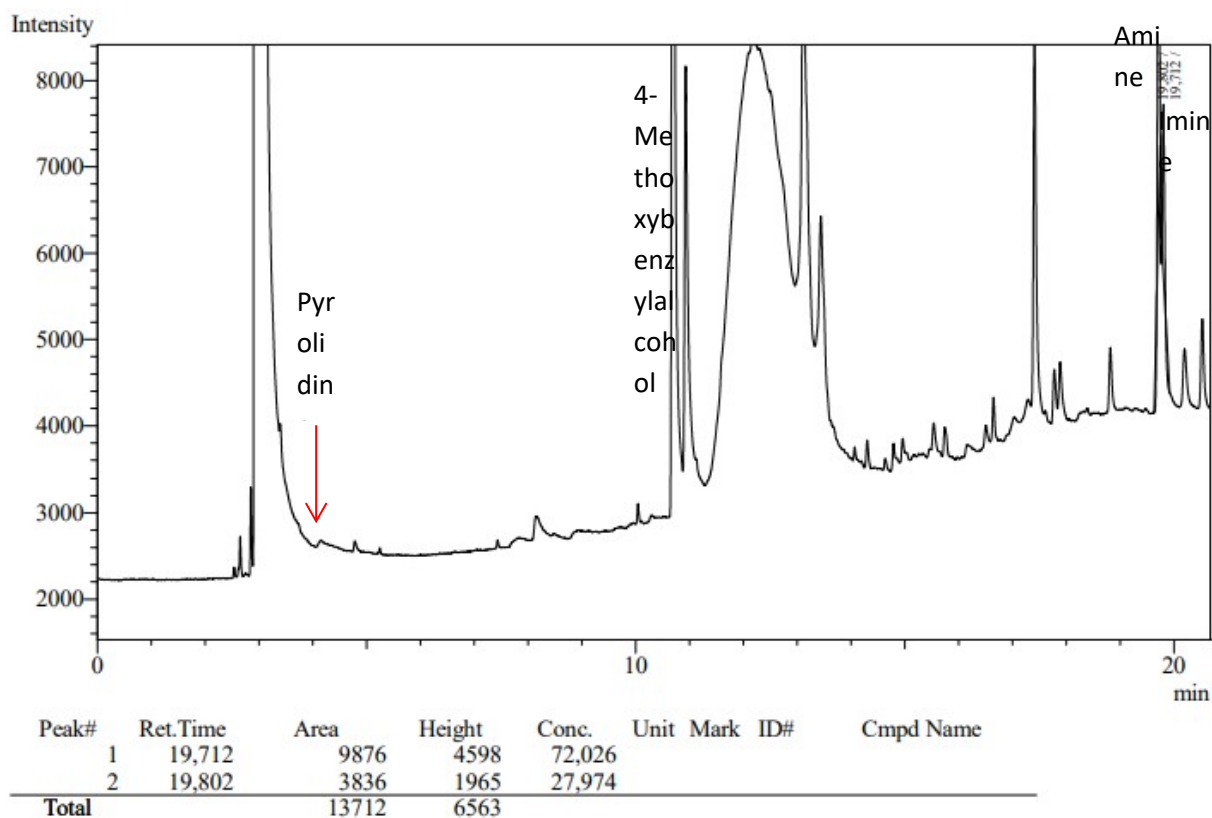

**Figure S9 :** Chromatogram for N-alkylation (pyrolidine – 4-methoxybenzylalcohol) catalysed by **3c**

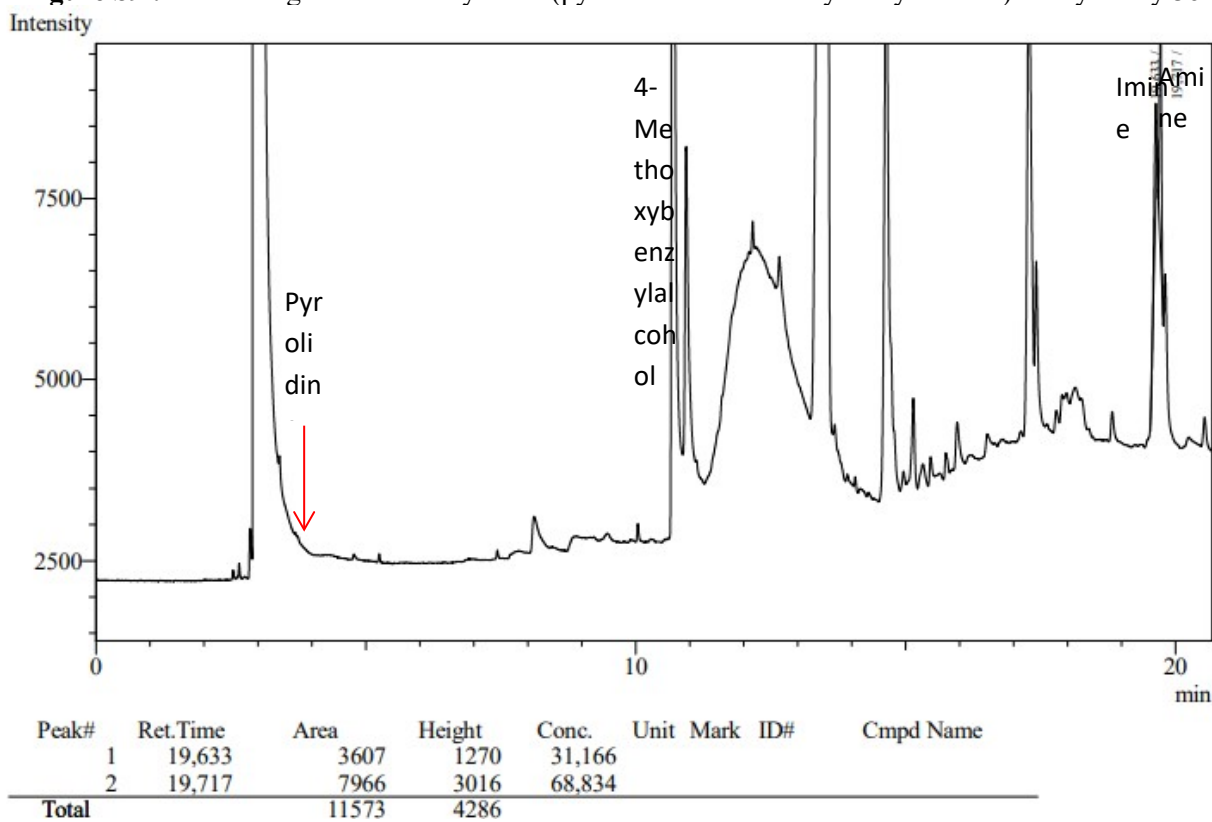

**Figure S10 :** Chromatogram for N-alkylation (pyrolidine – 4-methoxybenzylalcohol) catalysed by **3d**

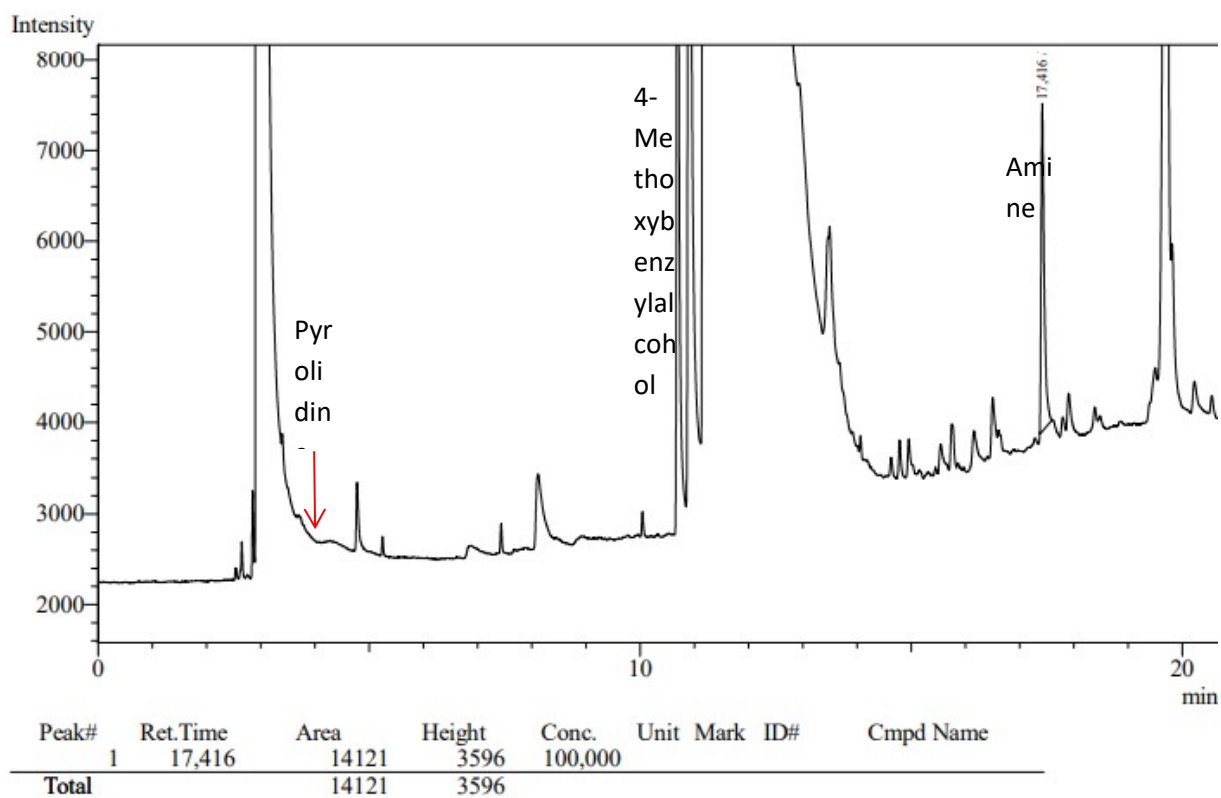

**Figure S11** : Chromatogram for N-alkylation (pyrrolidine – 4-methoxybenzylalcohol) catalysed by 3e

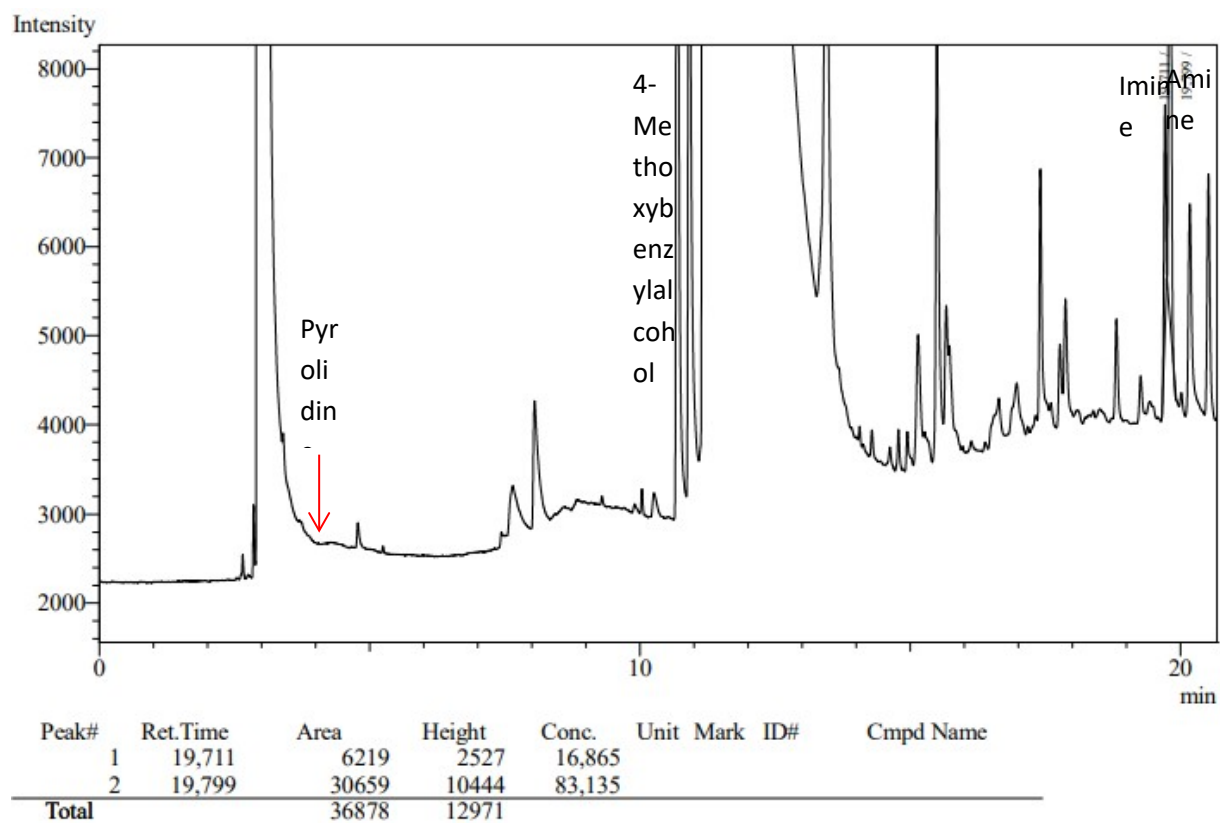

**Figure S12** : Chromatogram for N-alkylation (pyrrolidine – 4-methoxybenzylalcohol) catalysed by 3f

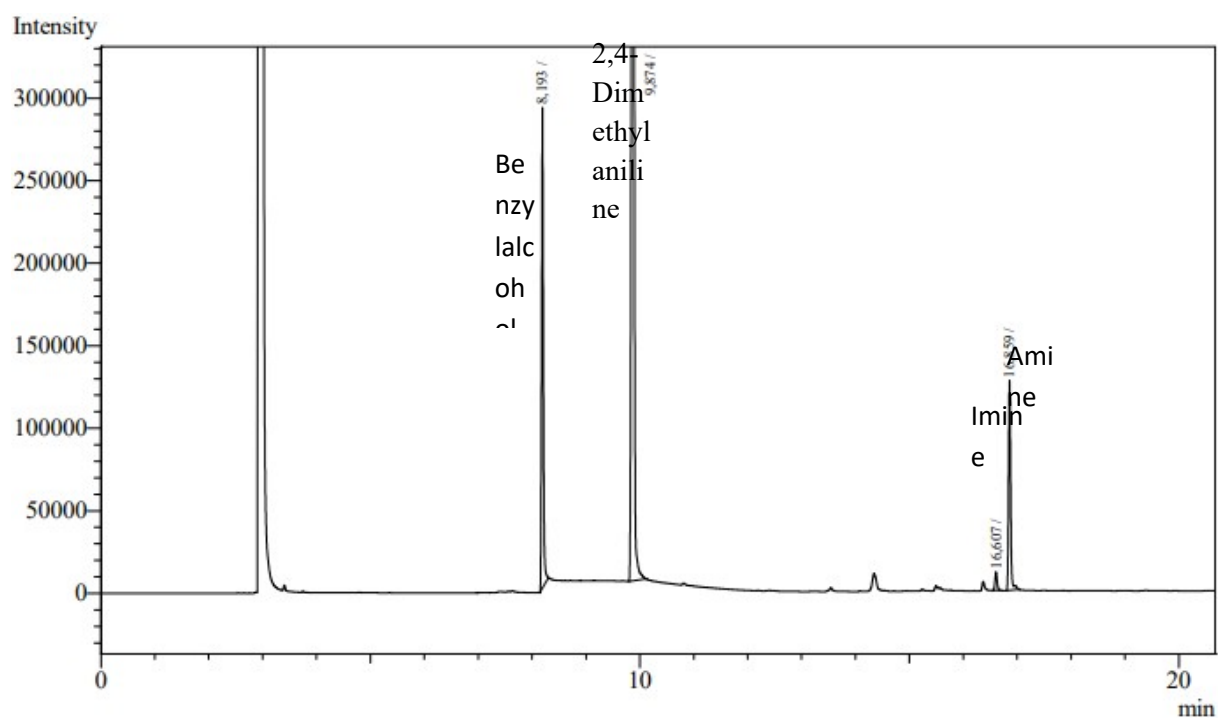

**Figure S13** : Chromatogram for N-alkylation (2,4-Dimethylaniline –benzylalcohol) catalysed by **3a**

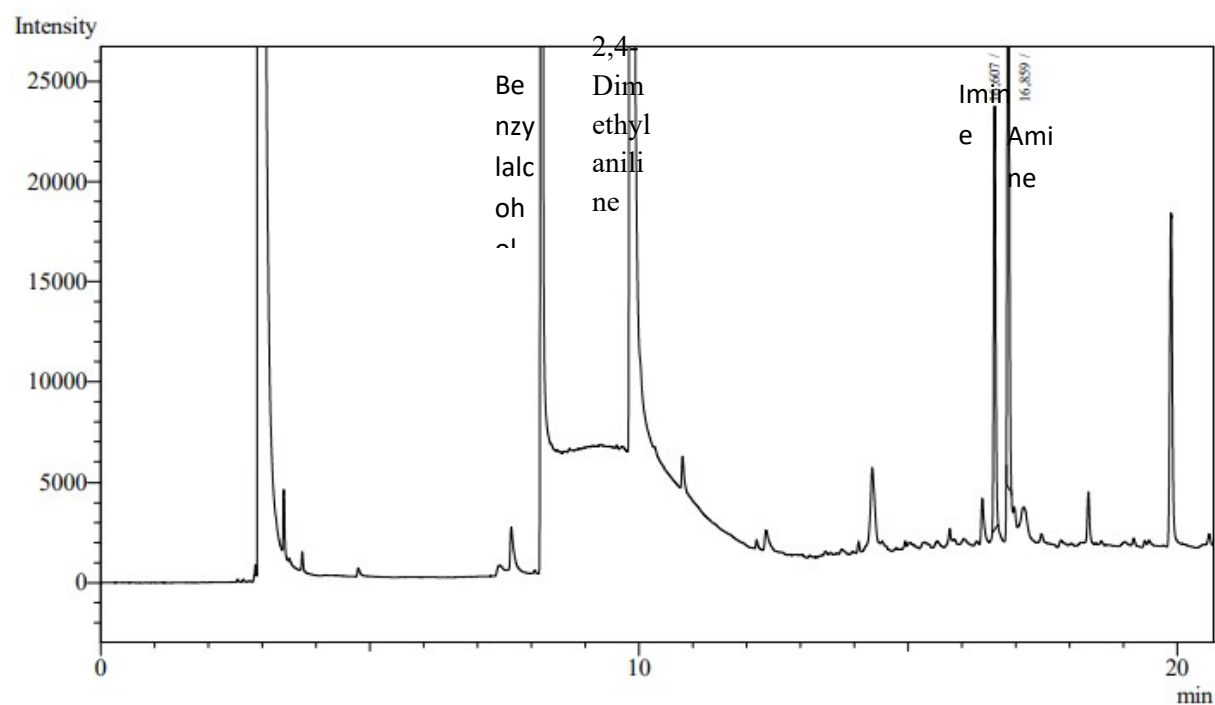

| Peak#        | Ret.Time | Area   | Height | Conc.  | Unit | Mark | ID# | Cmpd Name |
|--------------|----------|--------|--------|--------|------|------|-----|-----------|
| 1            | 16,607   | 53130  | 21011  | 36,723 |      |      |     |           |
| 2            | 16,859   | 91546  | 36595  | 63,277 |      |      |     |           |
| <b>Total</b> |          | 144676 | 57606  |        |      |      |     |           |

**Figure S14** : Chromatogram for N-alkylation (2,4-Dimethylaniline –benzylalcohol) catalysed by **3b**

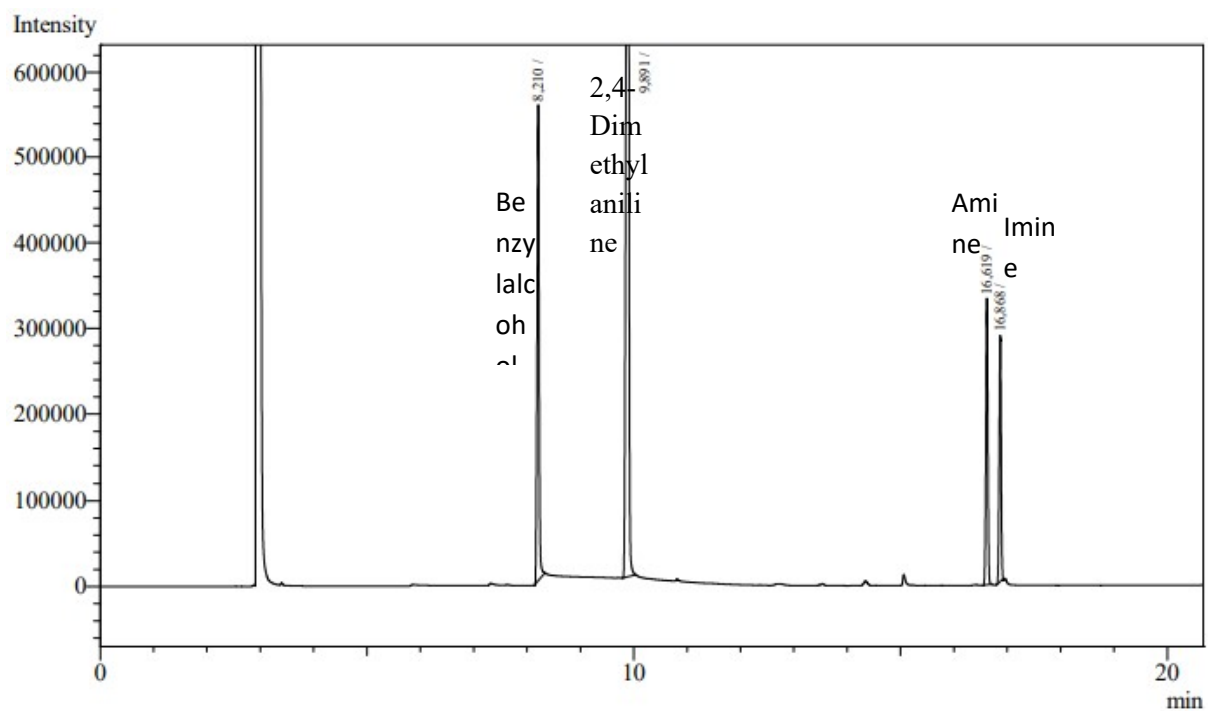

**Figure S15 :** Chromatogram for N-alkylation (2,4-Dimethylaniline –benzylalcohol) catalysed by **3c**

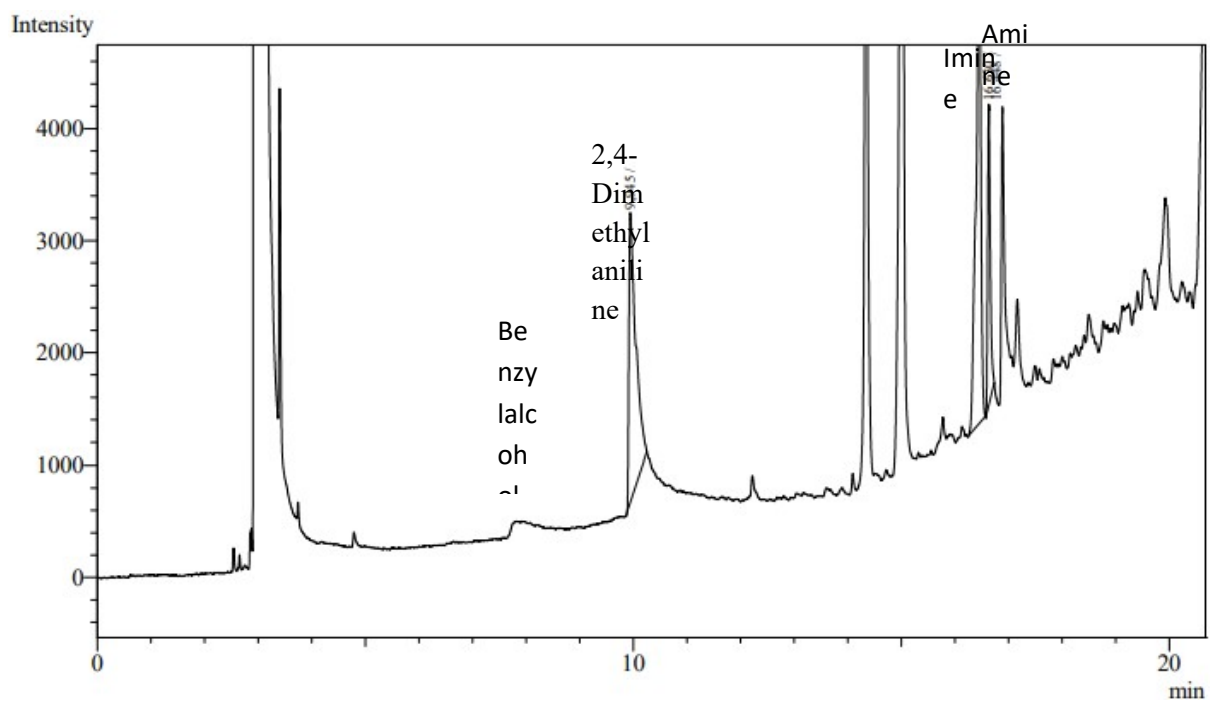

**Figure S16 :** Chromatogram for N-alkylation (2,4-Dimethylaniline –benzylalcohol) catalysed by **3d**

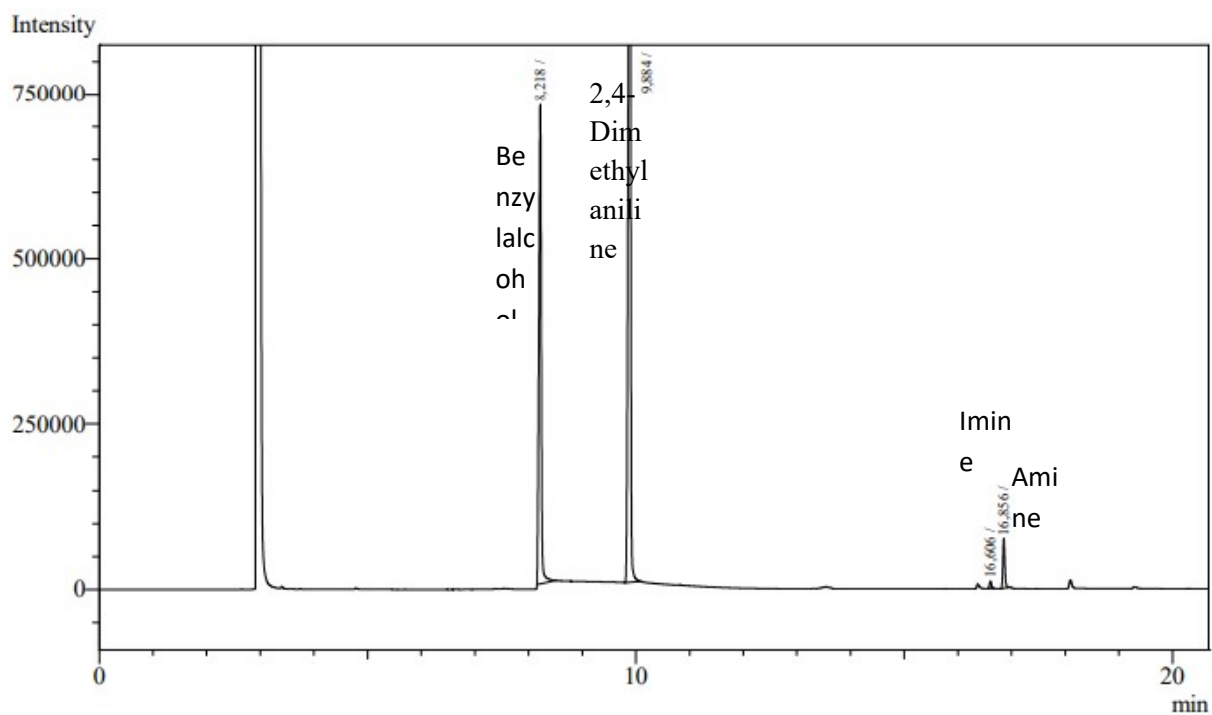

**Figure S17** : Chromatogram for N-alkylation (2,4-Dimethylaniline –benzylalcohol) catalysed by **3e**

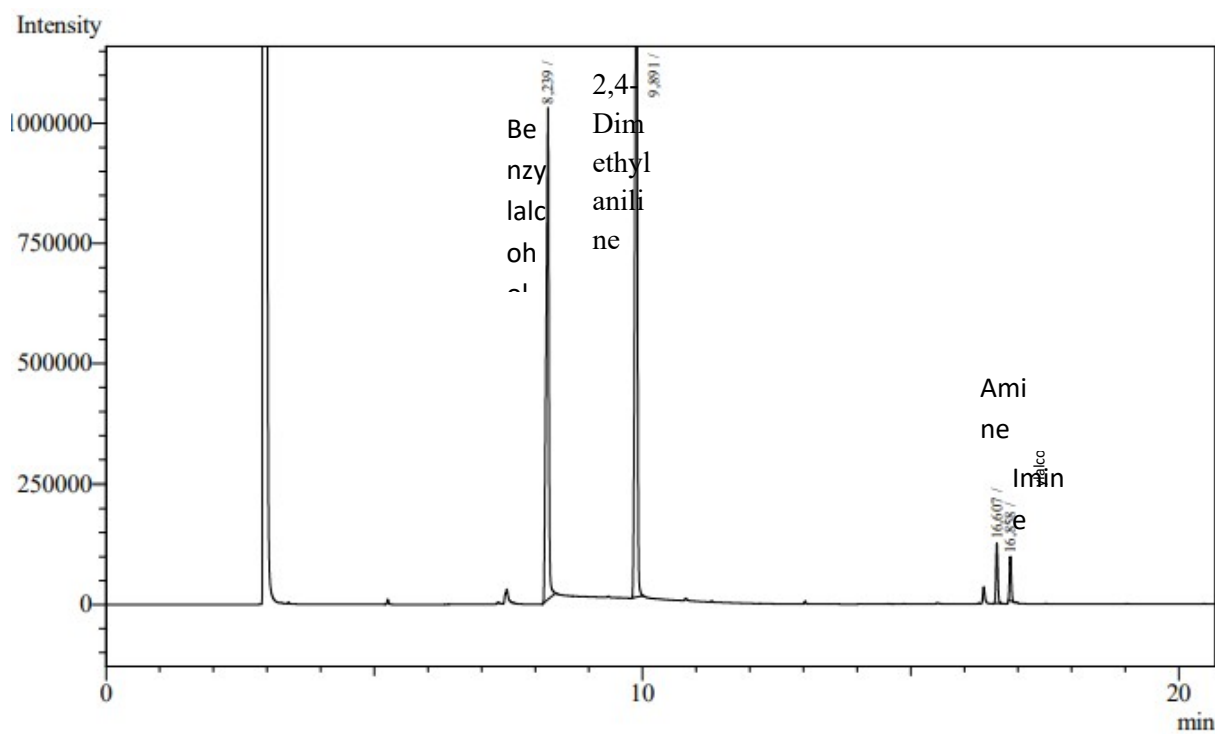

**Figure S18** : Chromatogram for N-alkylation (2,4-Dimethylaniline –benzylalcohol) catalysed by **3f**

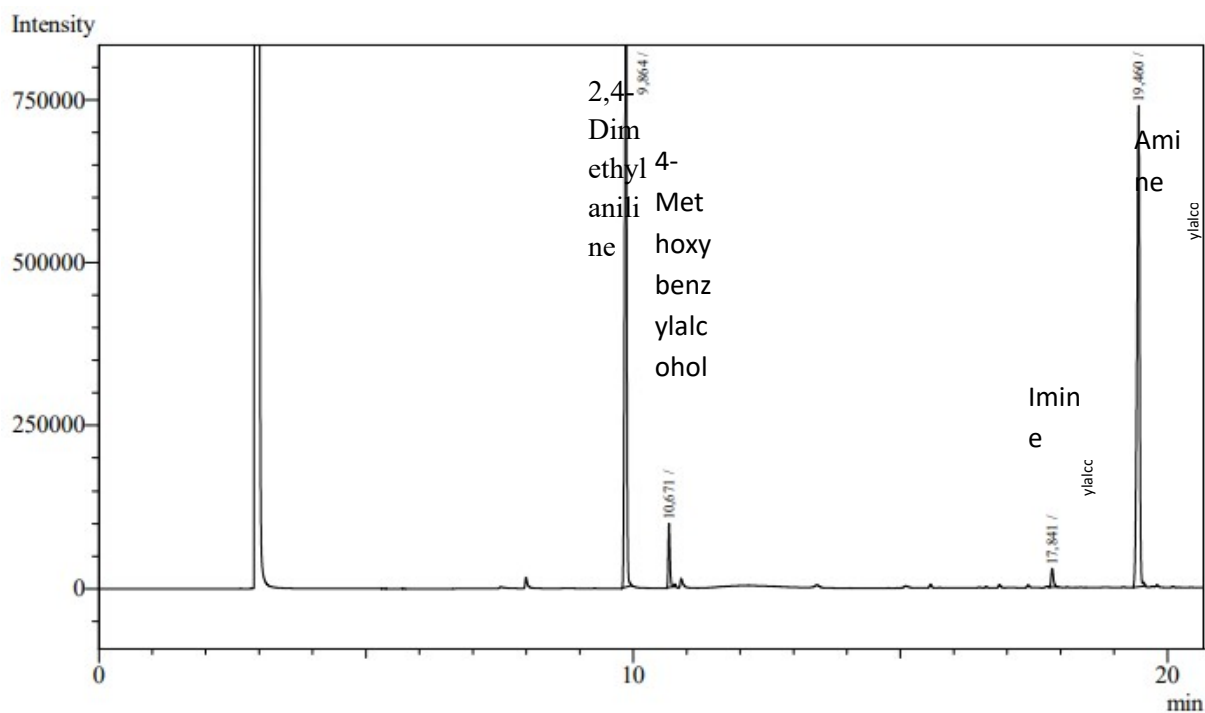

**Figure S19** : Chromatogram for N-alkylation (2,4-Dimethylaniline –4-methoxybenzylalcohol) catalysed by **3a**

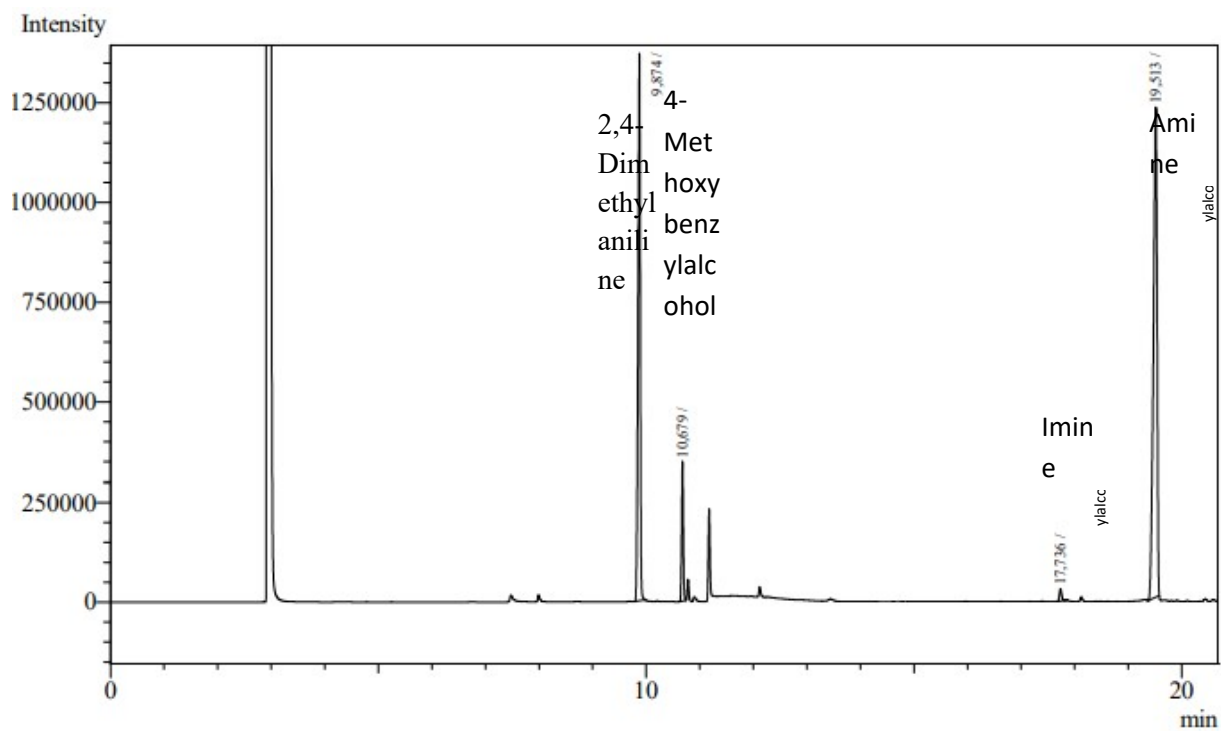

**Figure S20** : Chromatogram for N-alkylation (2,4-Dimethylaniline –4-methoxybenzylalcohol) catalysed by **3b**

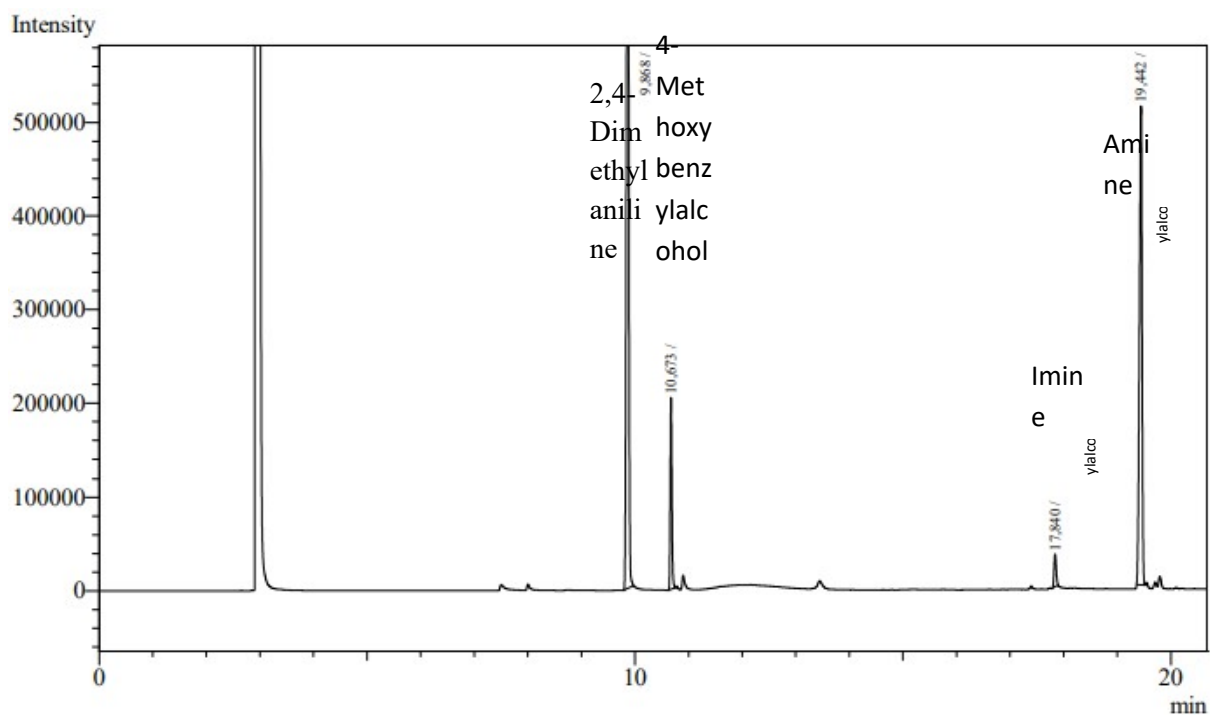

**Figure S21** : Chromatogram for N-alkylation (2,4-Dimethylaniline –4-methoxybenzylalcohol) catalysed by **3c**

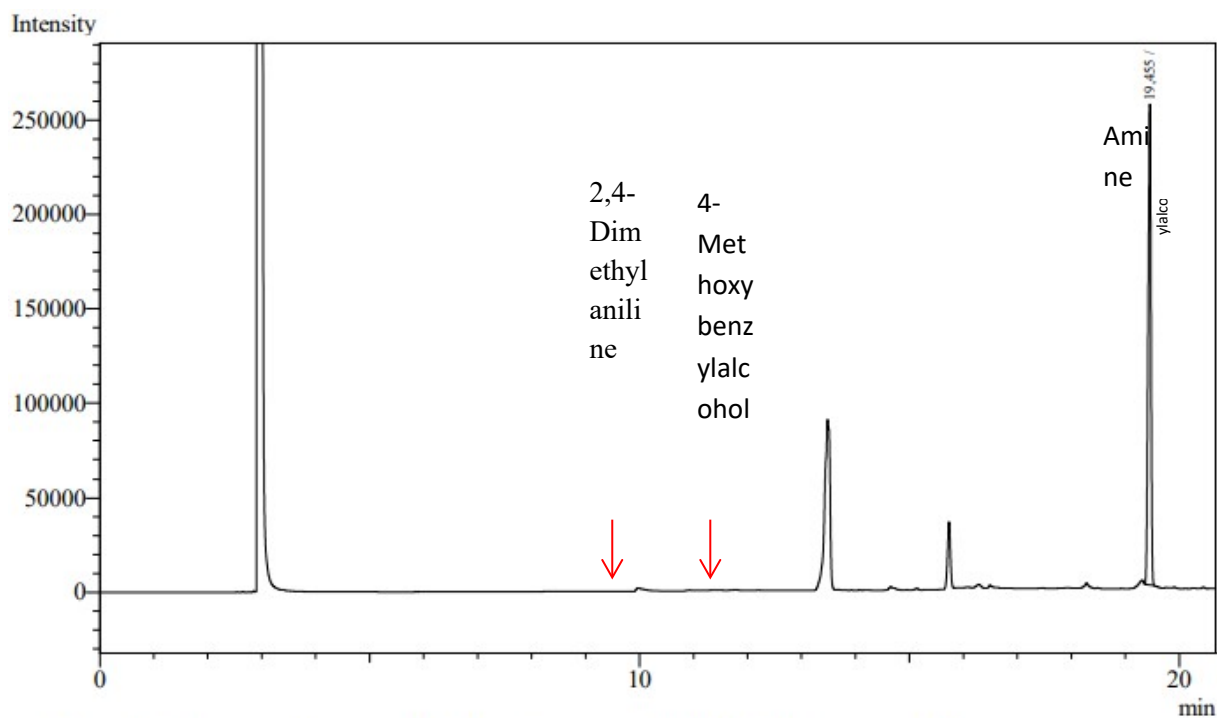

| Peak#        | Ret.Time | Area   | Height | Conc.   | Unit | Mark | ID# | Cmpd Name |
|--------------|----------|--------|--------|---------|------|------|-----|-----------|
| 1            | 19,455   | 921750 | 253906 | 100,000 |      |      |     |           |
| <b>Total</b> |          | 921750 | 253906 |         |      |      |     |           |

**Figure S22** : Chromatogram for N-alkylation (2,4-Dimethylaniline –4-methoxybenzylalcohol) catalysed by **3d**

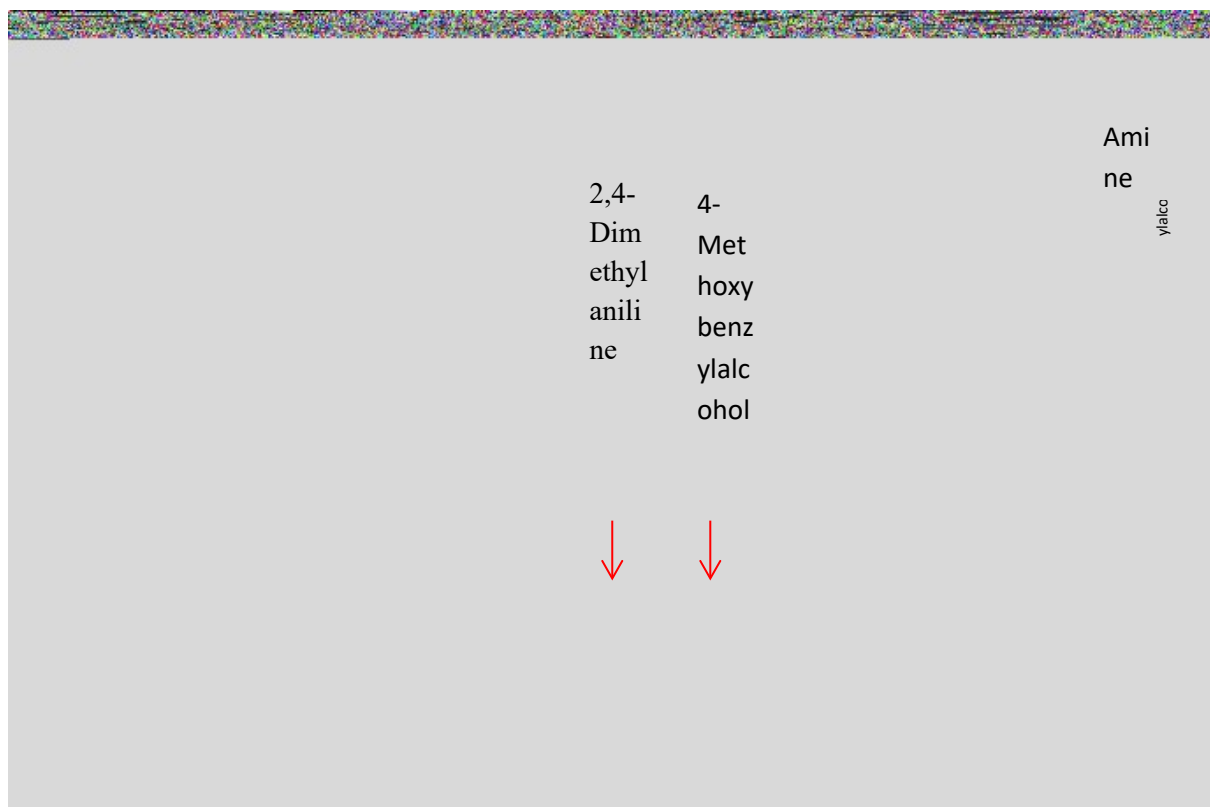

**Figure S23** : Chromatogram for N-alkylation (2,4-Dimethylaniline –4-methoxybenzylalcohol) catalysed by **3e**

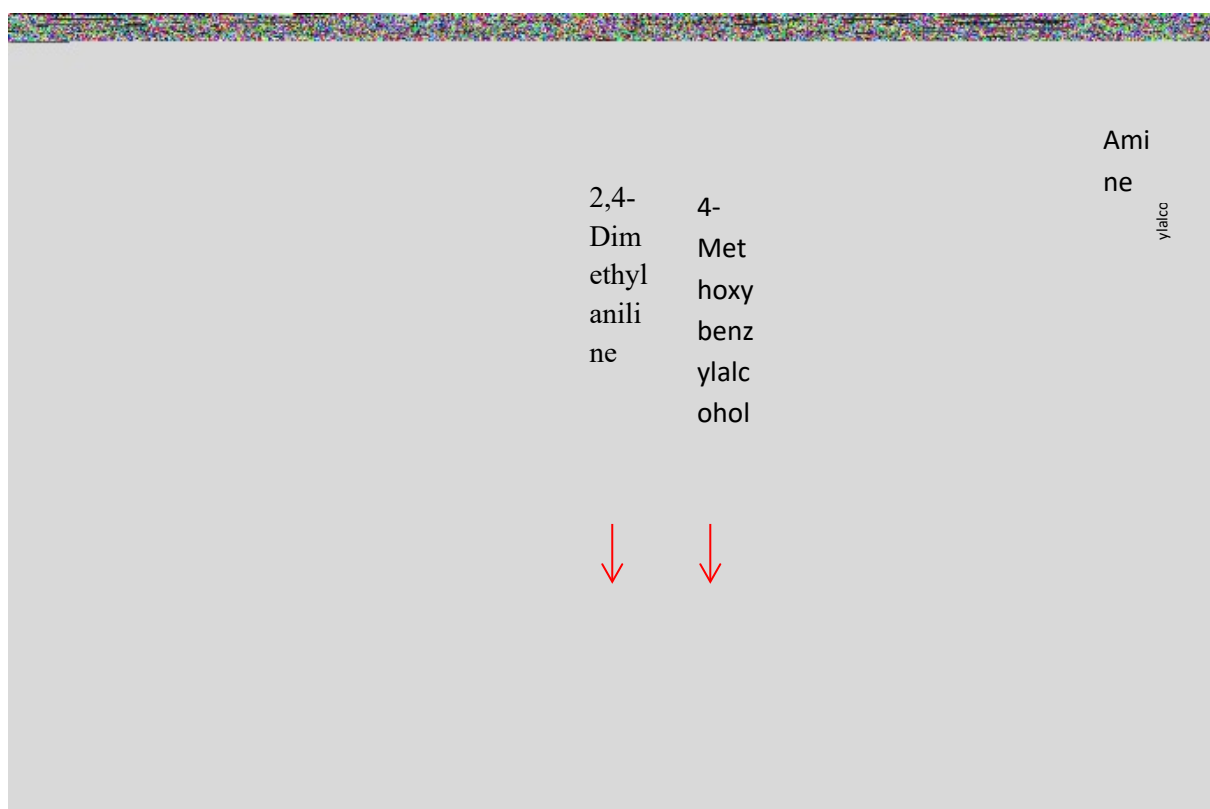

**Figure S24** : Chromatogram for N-alkylation (2,4-Dimethylaniline –4-methoxybenzylalcohol) catalysed by **3f**
