# Supplementary material for: Novel NHC-based Pd–PEPPSI complexes: synthesis, structural characterization by X-ray diffraction, biological properties, and catalytic performance in N-alkylation reactions
Source: Royal Society of Chemistry journal article supplement (doi:10.1039/d6ra00146g), 2026-04-13
Supplement: d6ra00146g2.pdf [file d6ra00146g2.pdf]

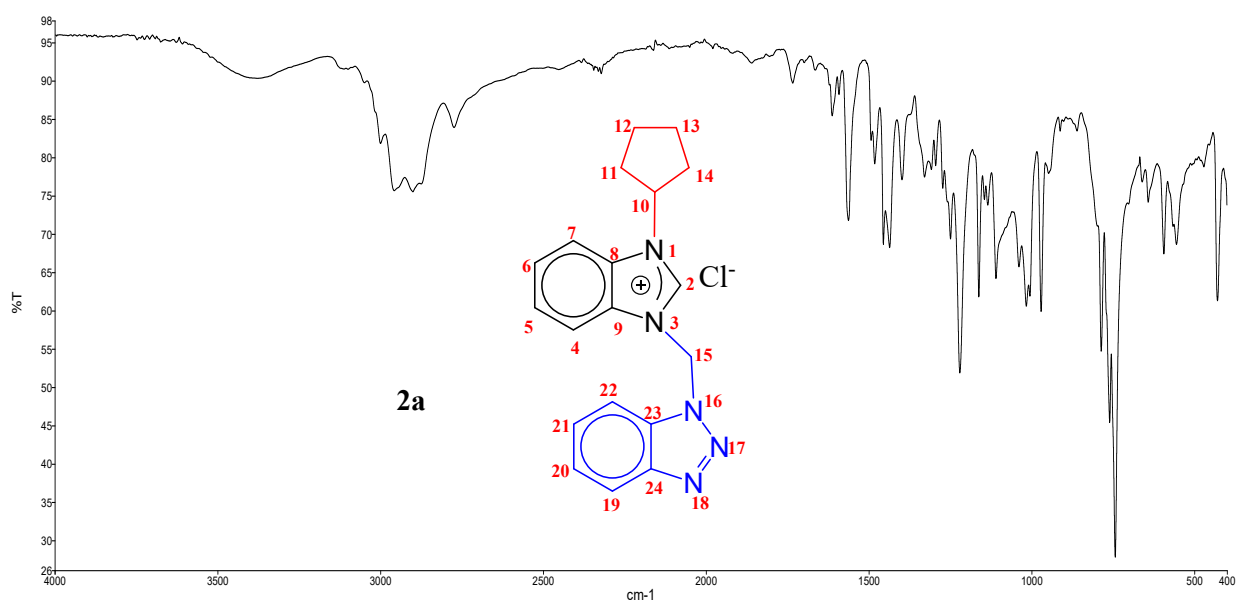

**Figure 1:** IR spectra of 1-cyclopentyl-3-(1-methylbenzo-1,2,3-triazolyl)benzimidazolium chloride (2a)

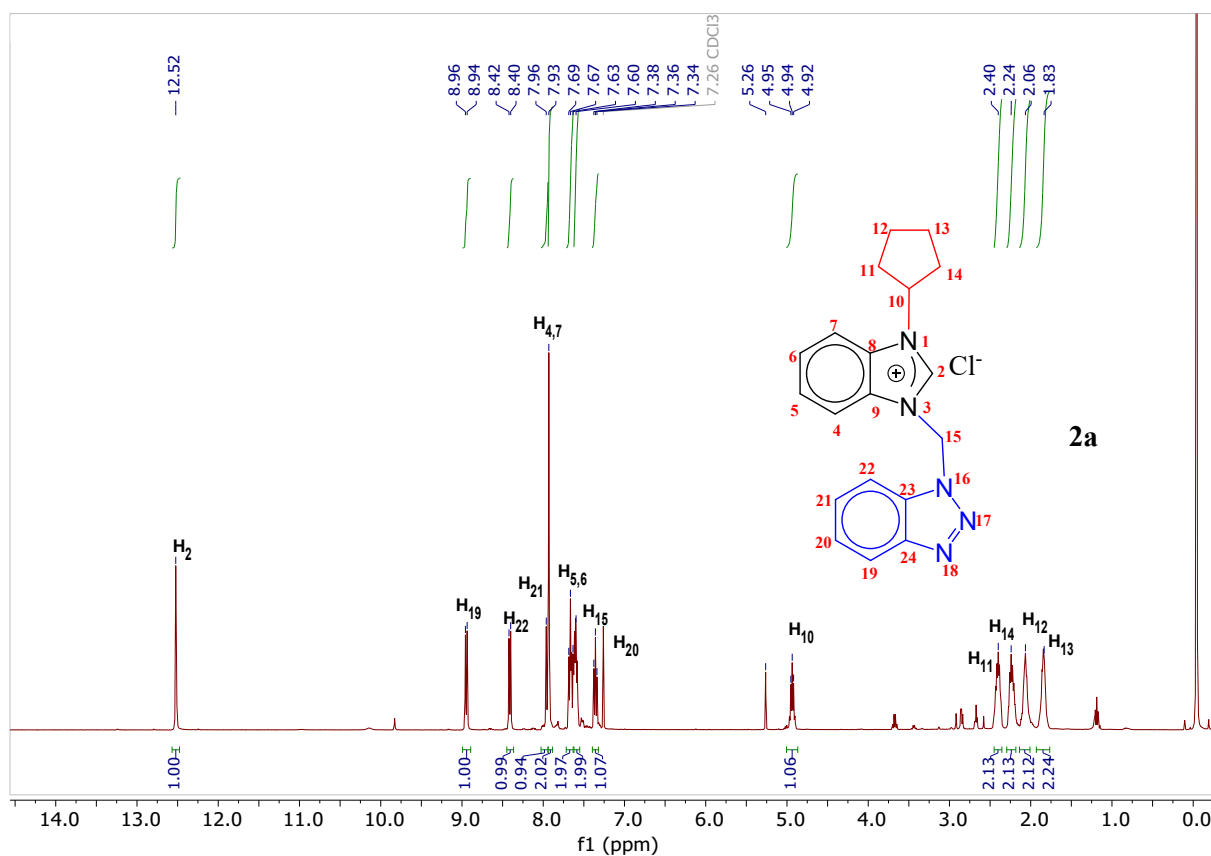

**Figure 2:** <sup>1</sup>H NMR spectra of 1-cyclopentyl-3-(1-methylbenzo-1,2,3-triazolyl)benzimidazolium chloride (2a)

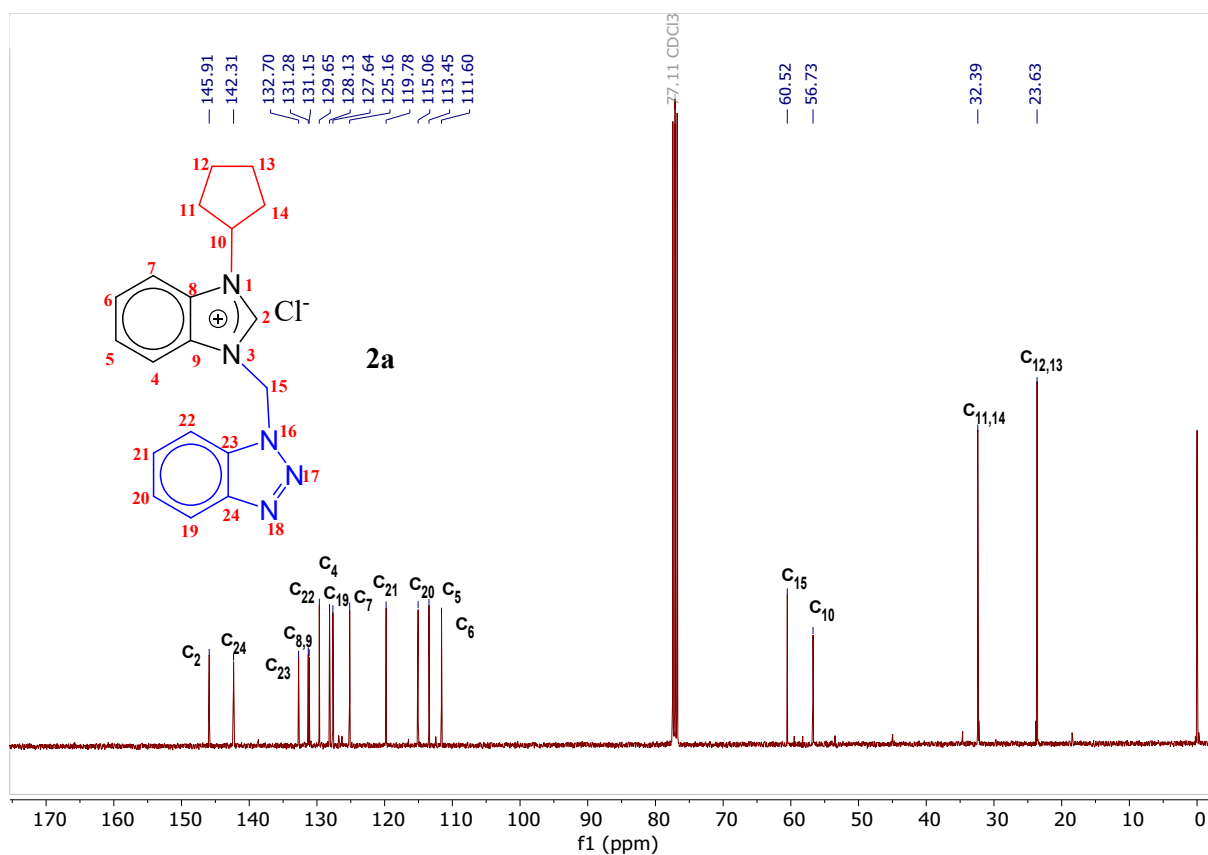

**Figure 3 :** <sup>13</sup>C NMR spectra of 1-cyclopentyl-3-(1-methylbenzo-1,2,3-triazolyl)benzimidazolium chloride (2a).

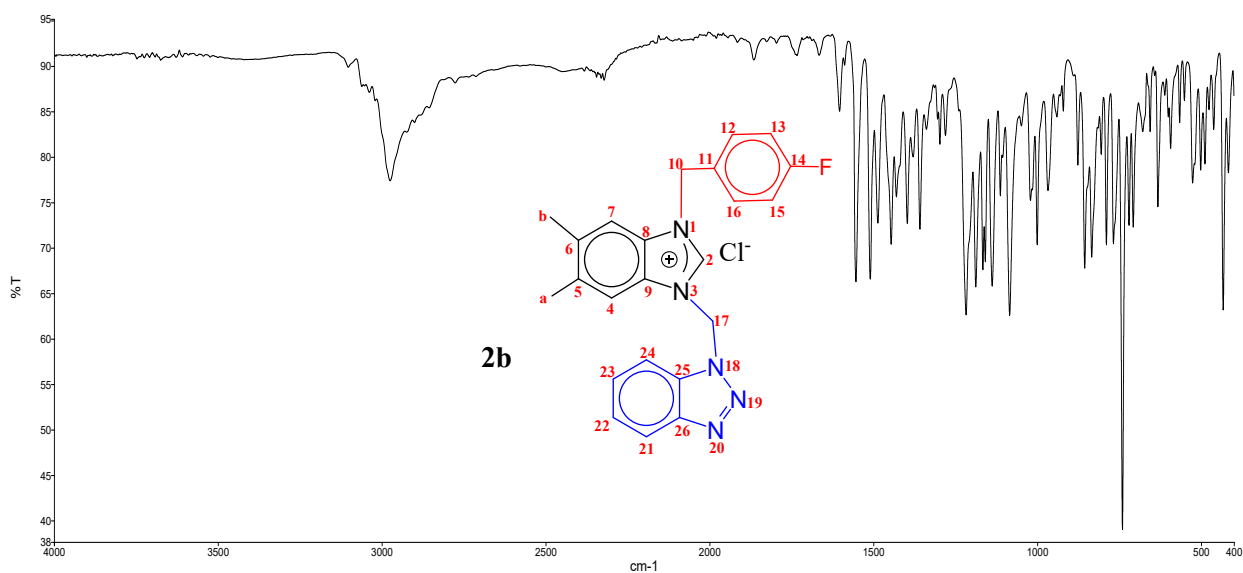

**Figure 4:** IR spectra of 1-(4-fluorobenzyl)-3-(1-methylbenzo-1,2,3-triazolyl)-5,6-dimethylbenzimidazolium chloride (2b).

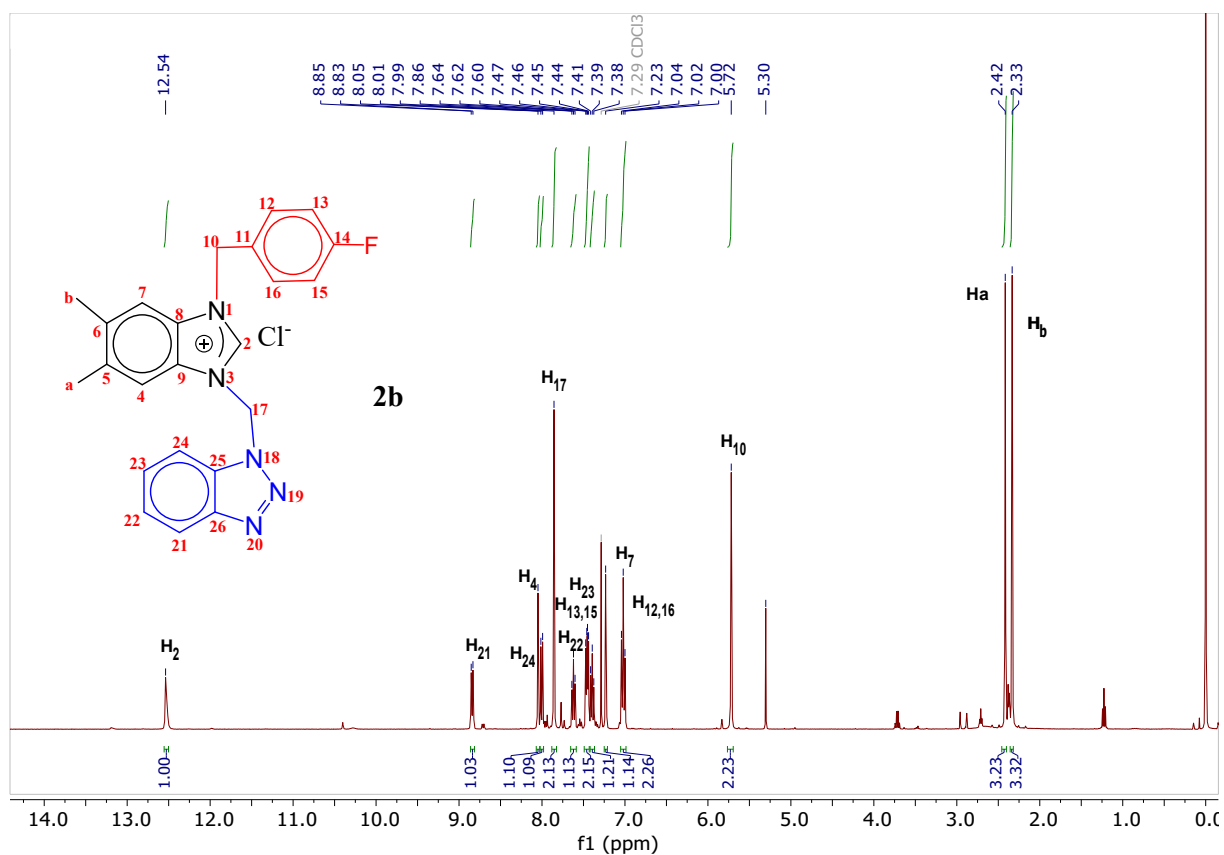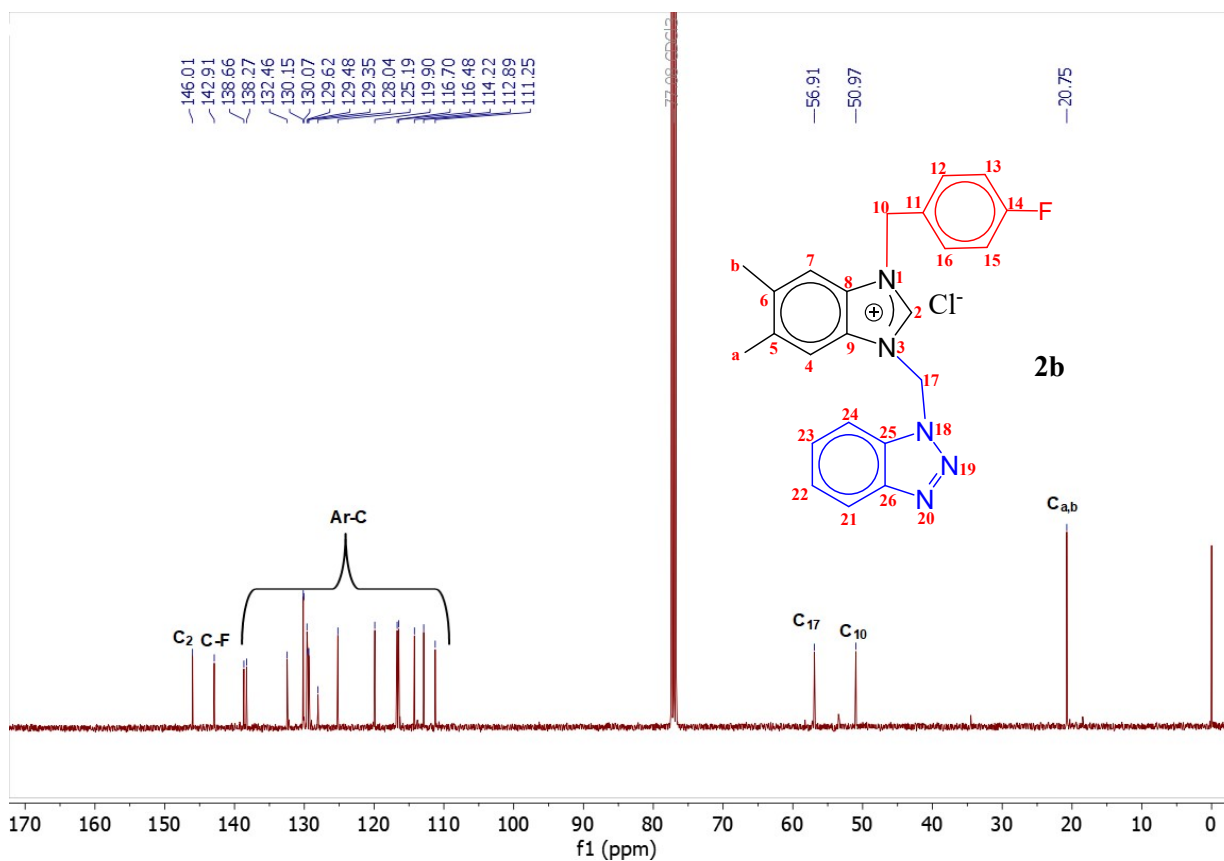

**Figure 6 :**  $^{13}\text{C}$ NMR spectra of 1-(4-fluorobenzyl)-3-(1-methylbenzo-1,2,3-triazolyl)-5,6-dimethylbenzimidazolium chloride (2b).

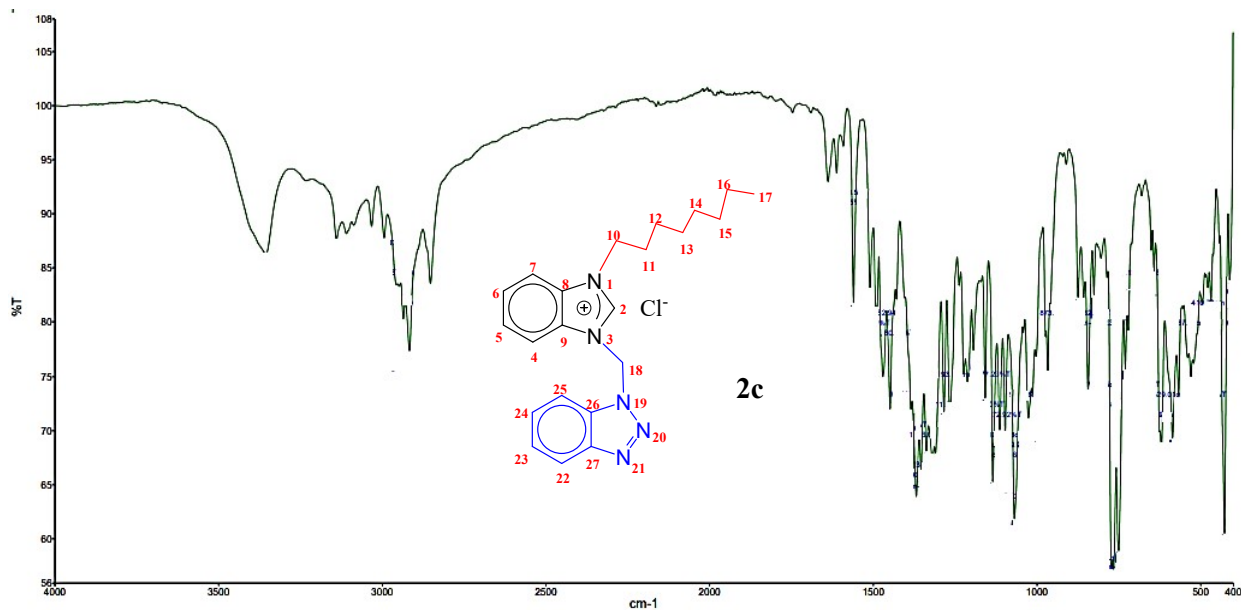

**Figure 7:** IR spectra of 1-octyl-3-(1-methylbenzo-1,2,3-triazolyl)-5,6-dimethylbenzimidazolium chloride (2c).

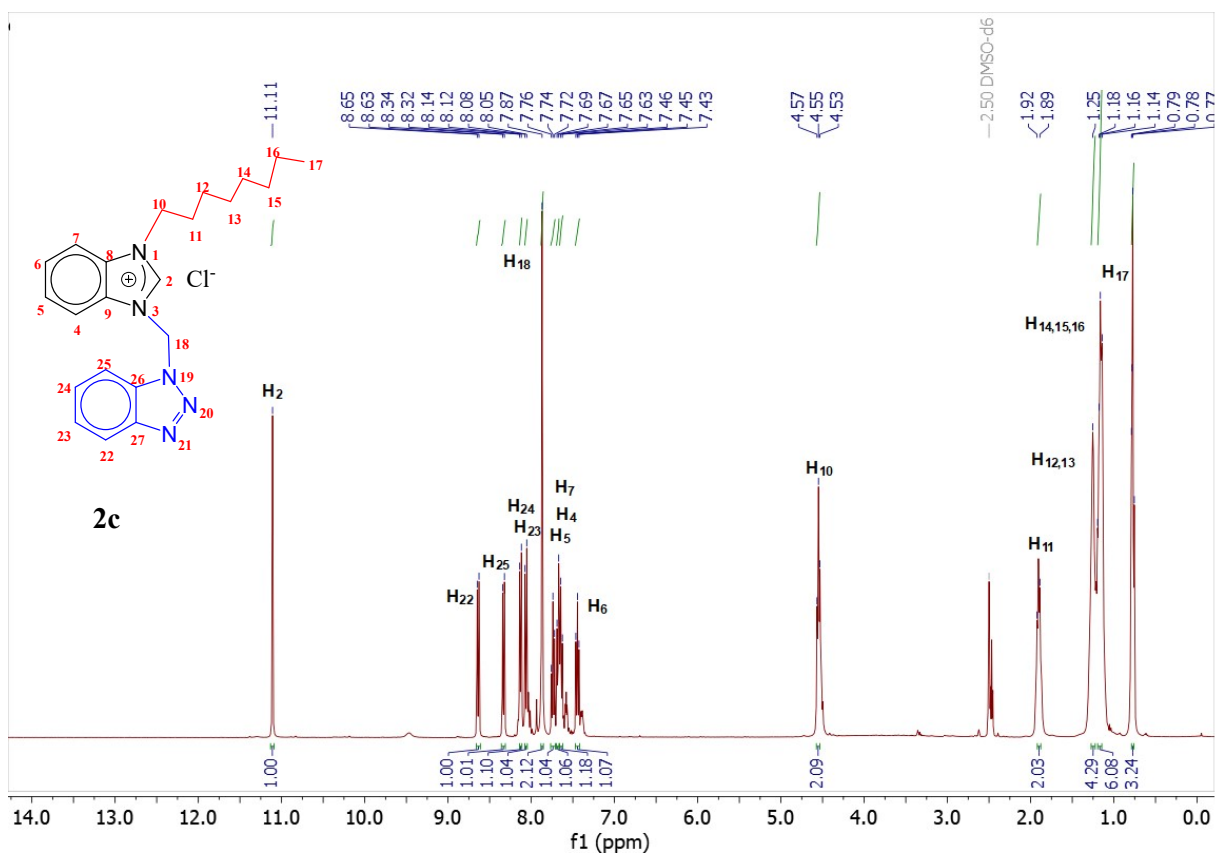

**Figure 8 :**  $^1\text{H}$  NMR spectra of 1-octyl-3-(1-methylbenzo-1,2,3-triazolyl)-5,6-dimethylbenzimidazolium chloride (2c)

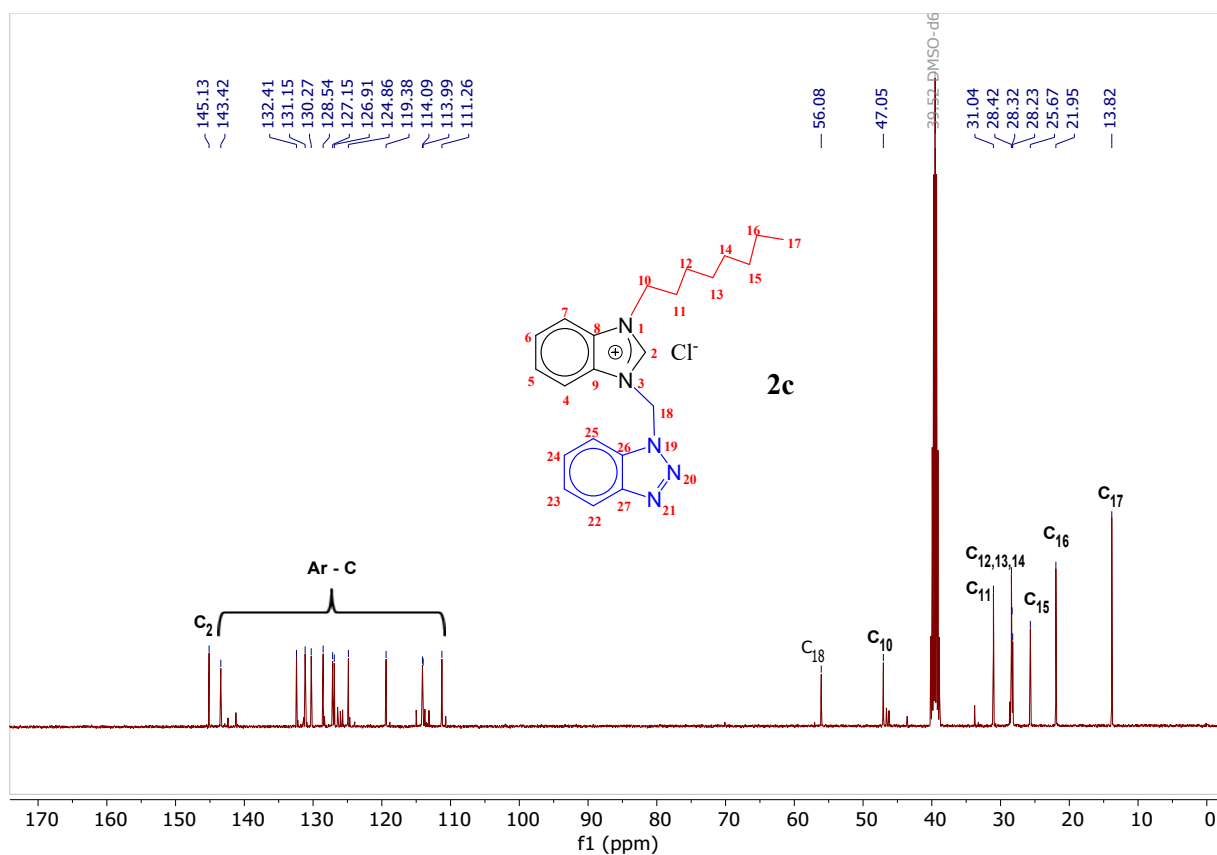

**Figure 9 :** <sup>13</sup>C NMR spectra of 1-octyl-3-(1-methylbenzo-1,2,3-triazolyl)-5,6-dimethylbenzimidazolium chloride (2c).

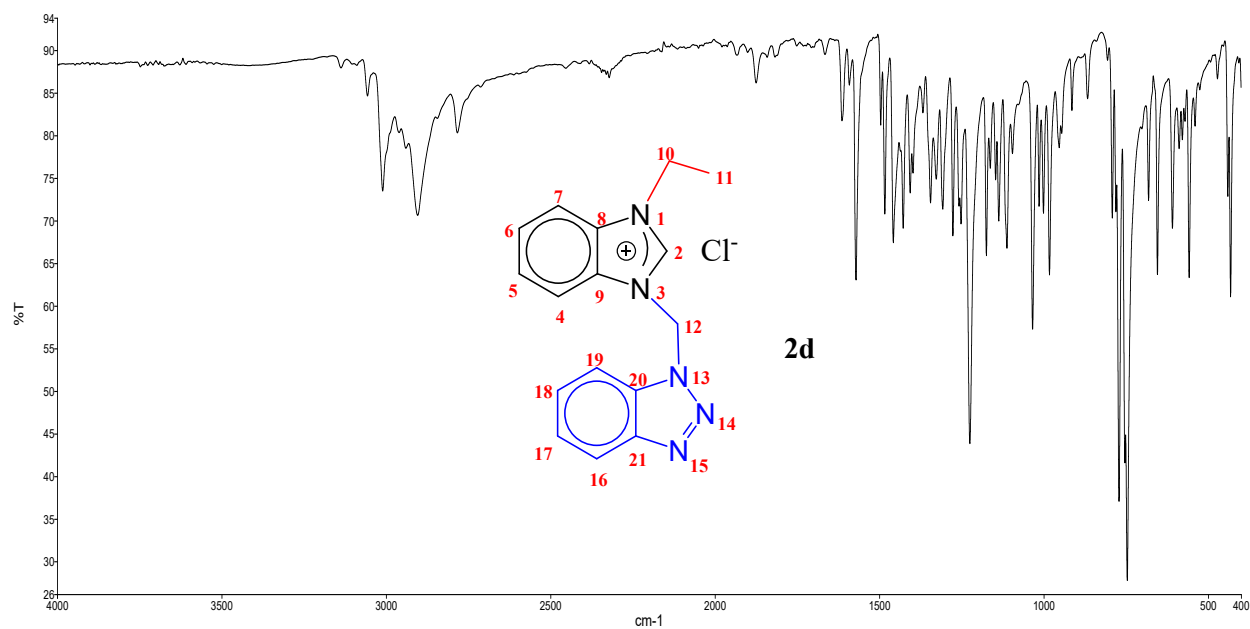

**Figure 10:** IR spectra of 1-Ethyl-3-(1-methylbenzo-1,2,3-triazolyl)benzimidazolium chloride (2d).

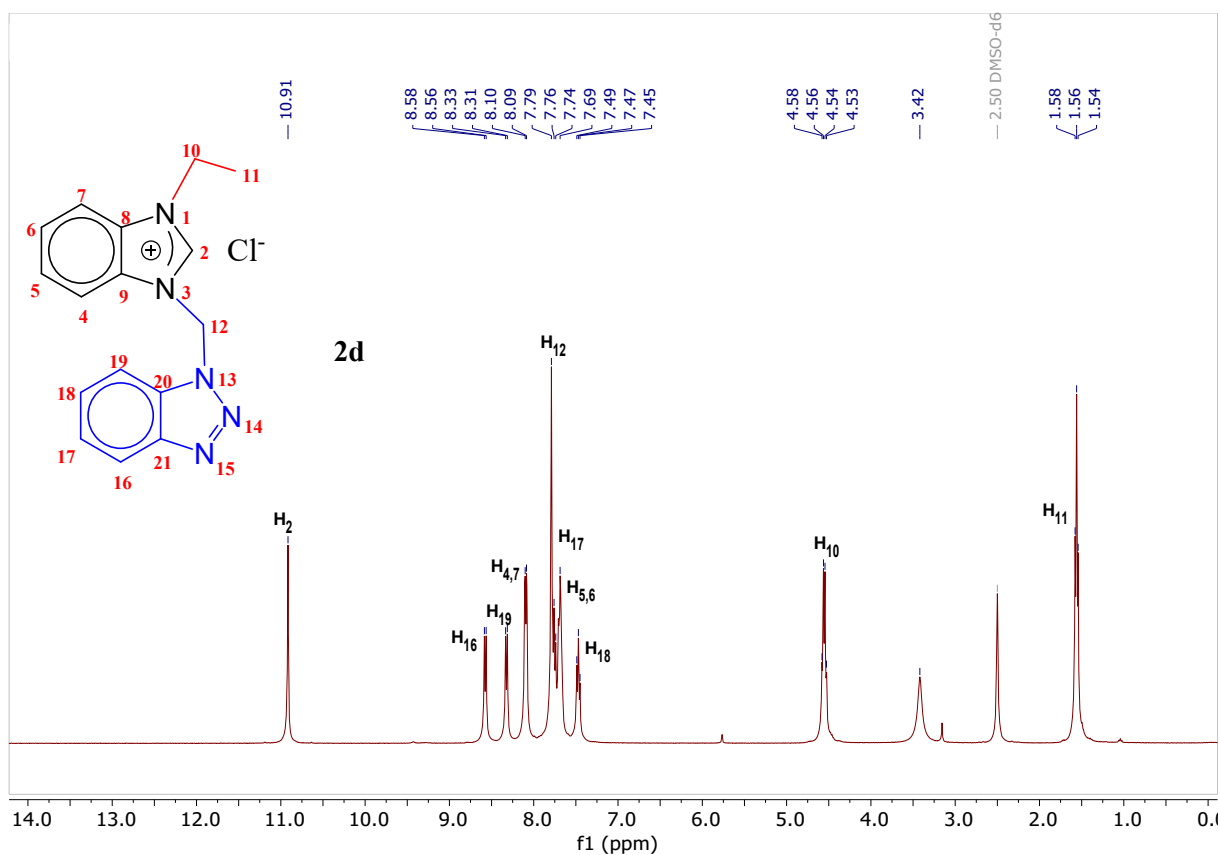

**Figure 11** :  $^1\text{H}$  NMR spectra of 1-Ethyl-3-(1-methylbenzo-1,2,3-triazolyl)benzimidazolium chloride (2d).

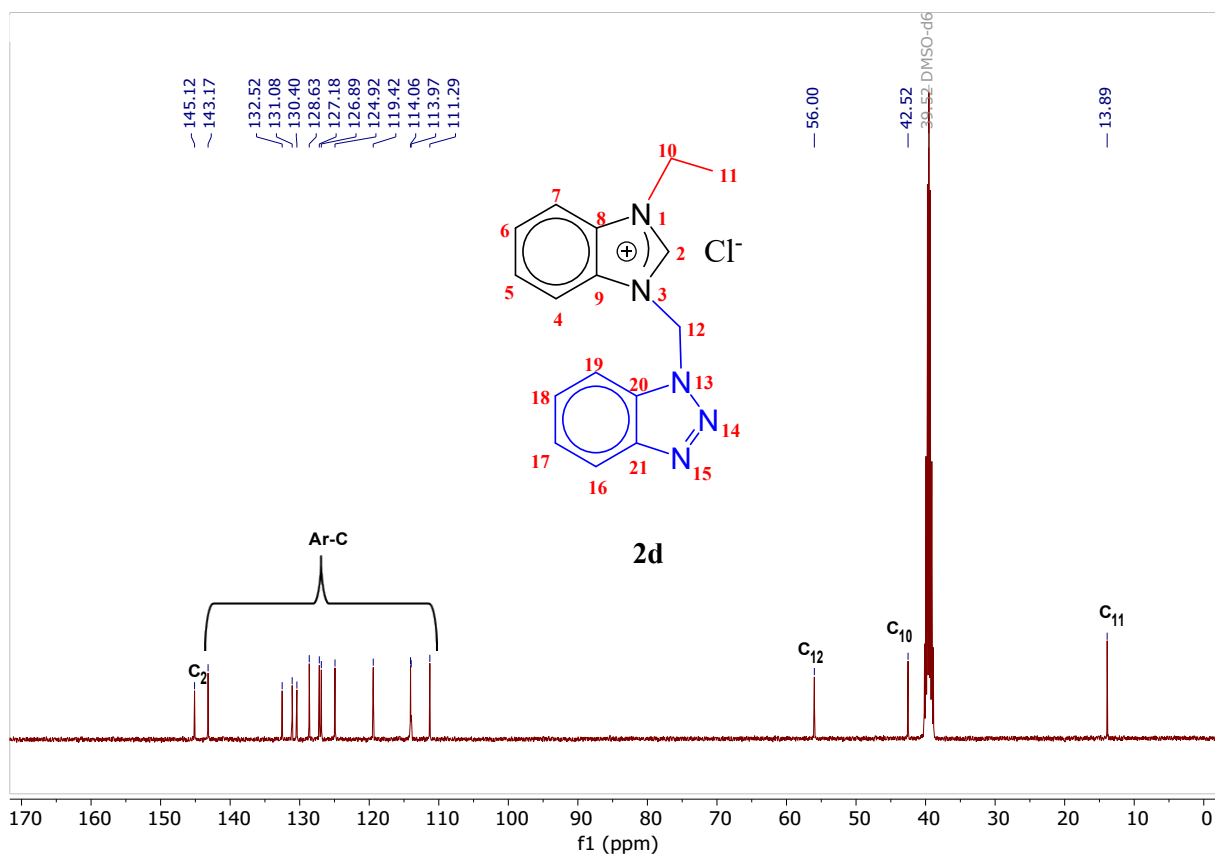

**Figure 12 :**  $^{13}\text{C}$  NMR spectra of 1-Ethyl-3-(1-methylbenzo-1,2,3-triazolyl)benzimidazolium chloride (2d).

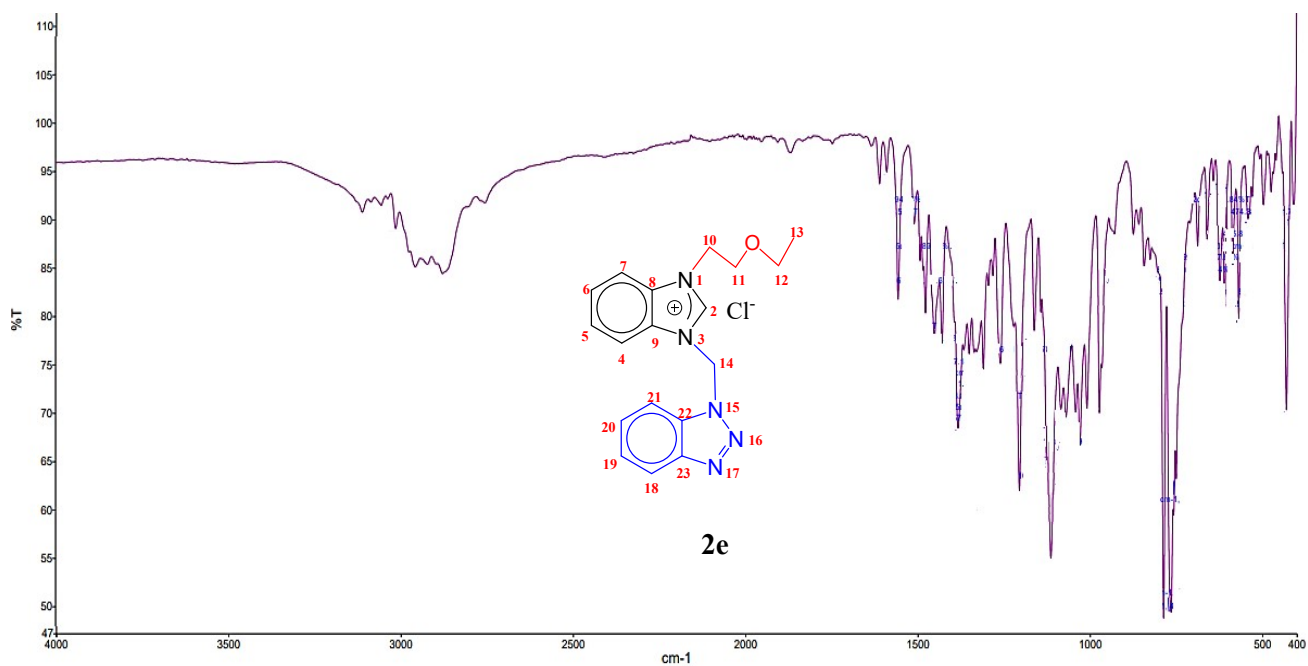

**Figure 13:** IR spectra of 1-(2-ethoxyethyl)-3-(1-methylbenzo-1,2,3-triazolyl)benzimidazolium chloride (2e)

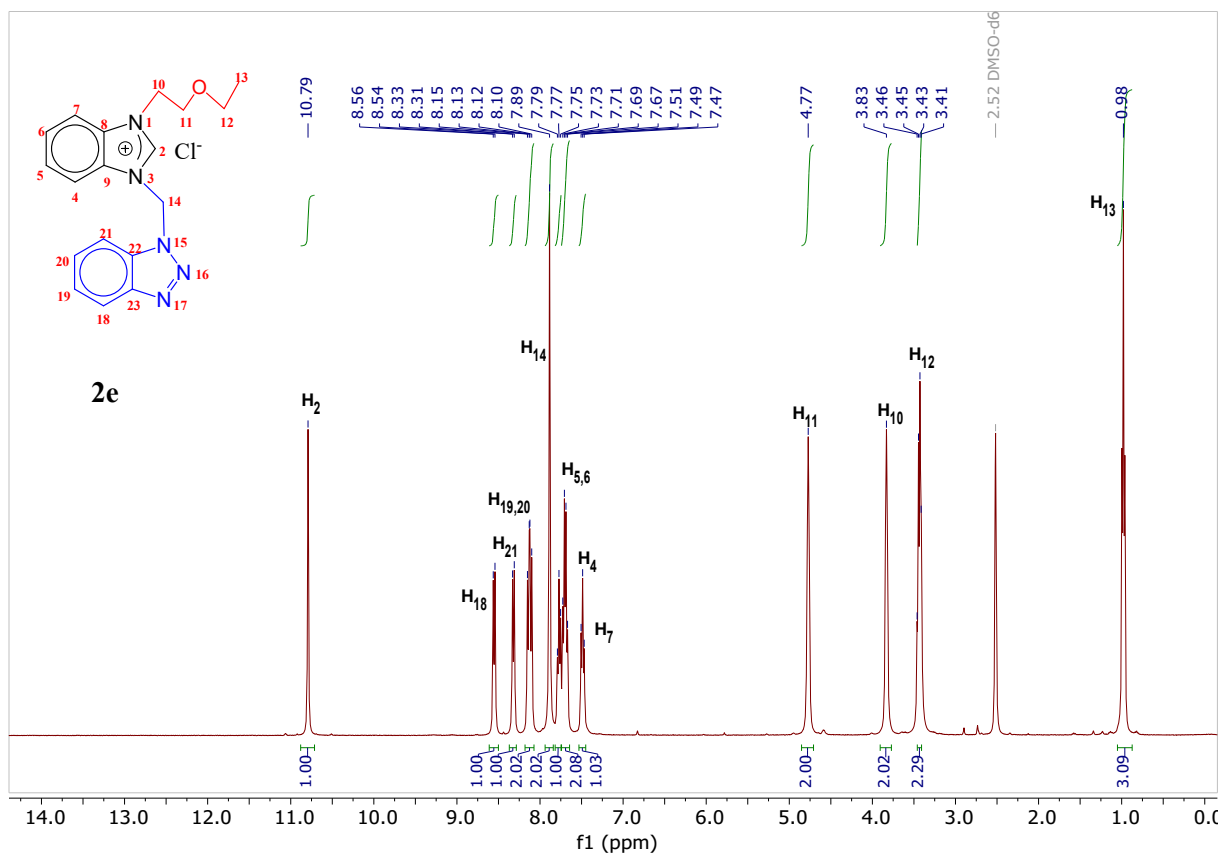

**Figure 14 :**  $^1\text{H}$  NMR spectra of 1-(2-ethoxyethyl)-3-(1-methylbenzo-1,2,3-triazolyl)benzimidazolium chloride (2e).

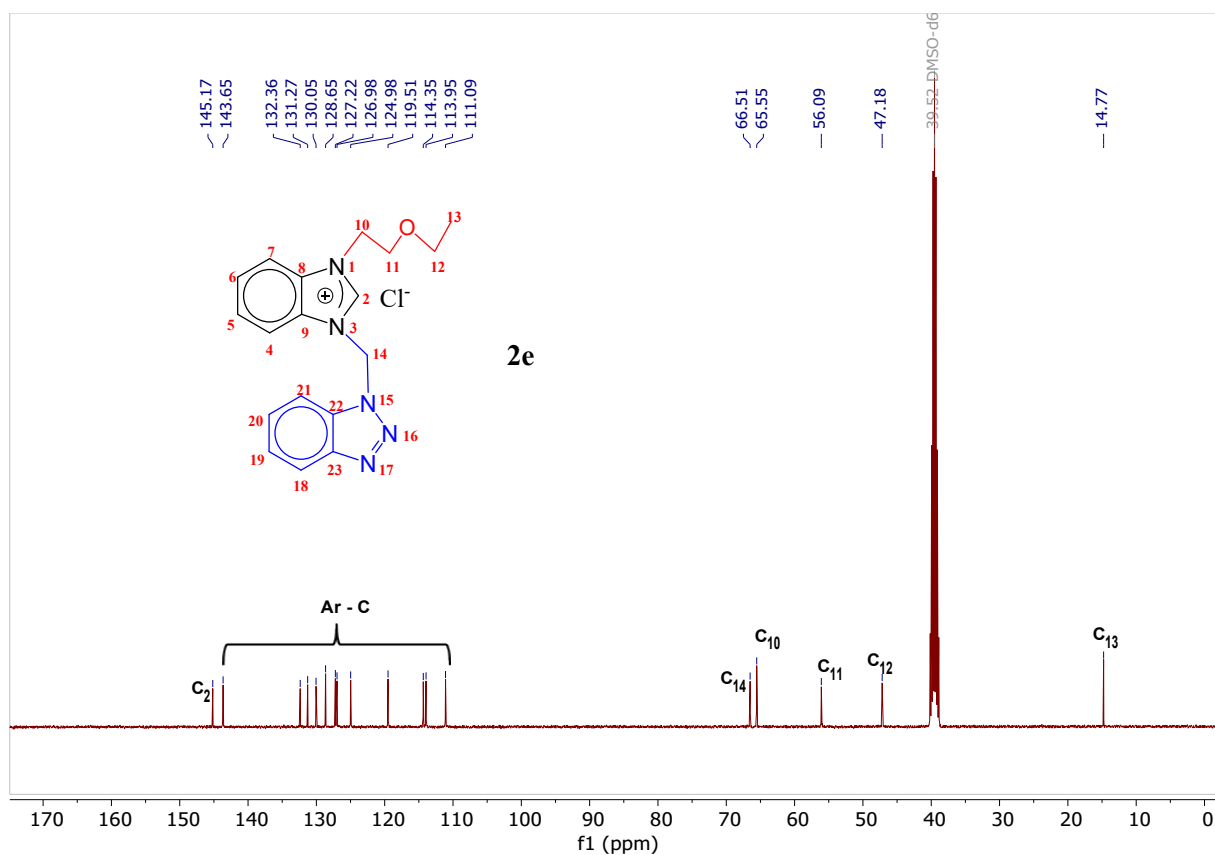

**Figure 15 :** <sup>13</sup>CNMR spectra of 1-(2-ethoxyethyl)-3-(1-methylbenzo-1,2,3-triazolyl)benzimidazolium chloride (2e).

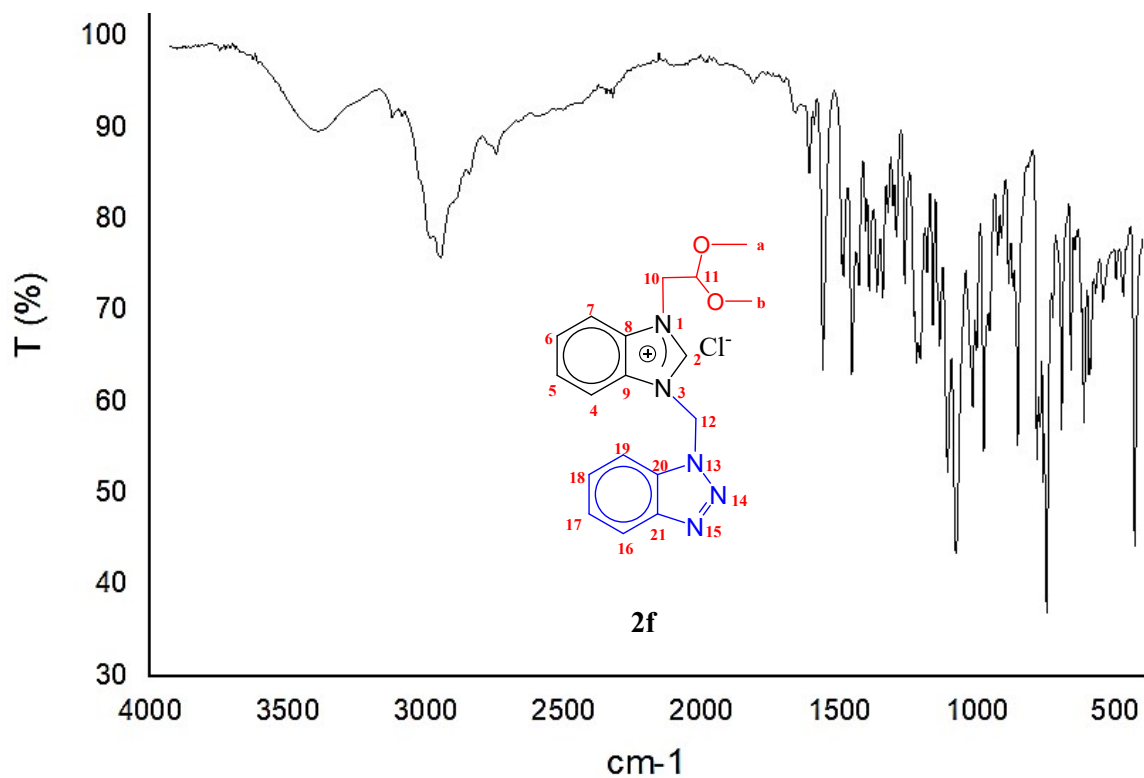

**Figure 16:** IR spectra of 1-(2,2-dimethoxyethyl)-3-(1-methylbenzo-1,2,3-triazolyl)benzimidazolium chloride (2f).

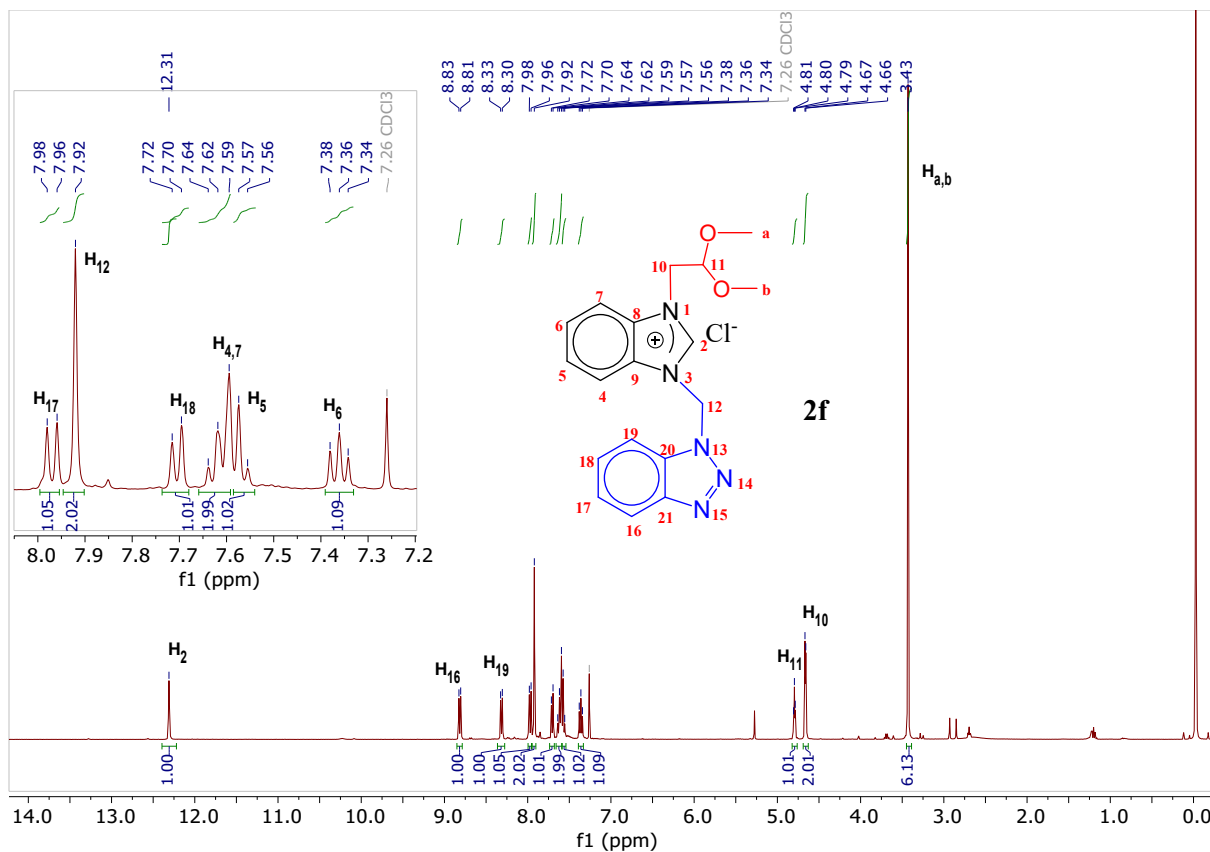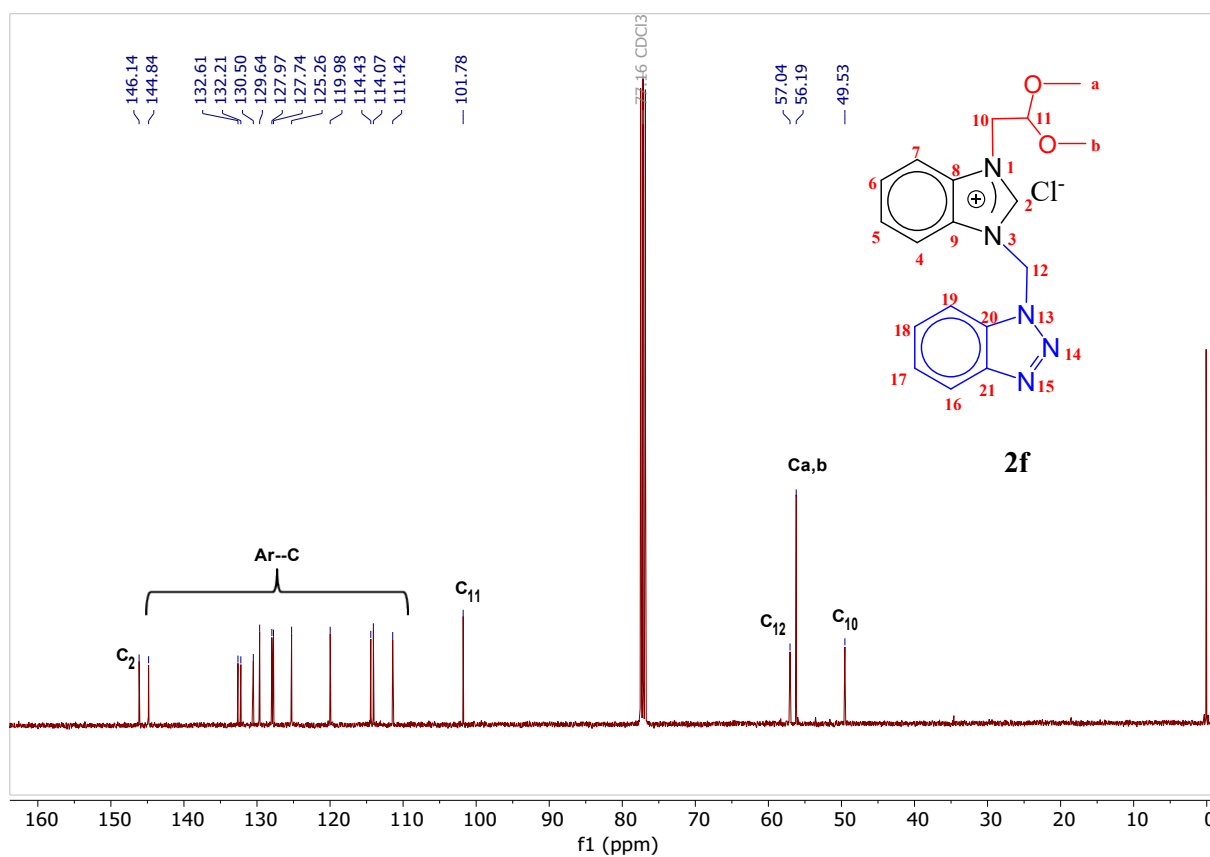

**Figure 18 :**  $^{13}\text{C}$ NMR spectra of 1-(2,2-dimethoxyethyl)-3-(1-methylbenzo-1,2,3-triazolyl)benzimidazolium chloride (2f).

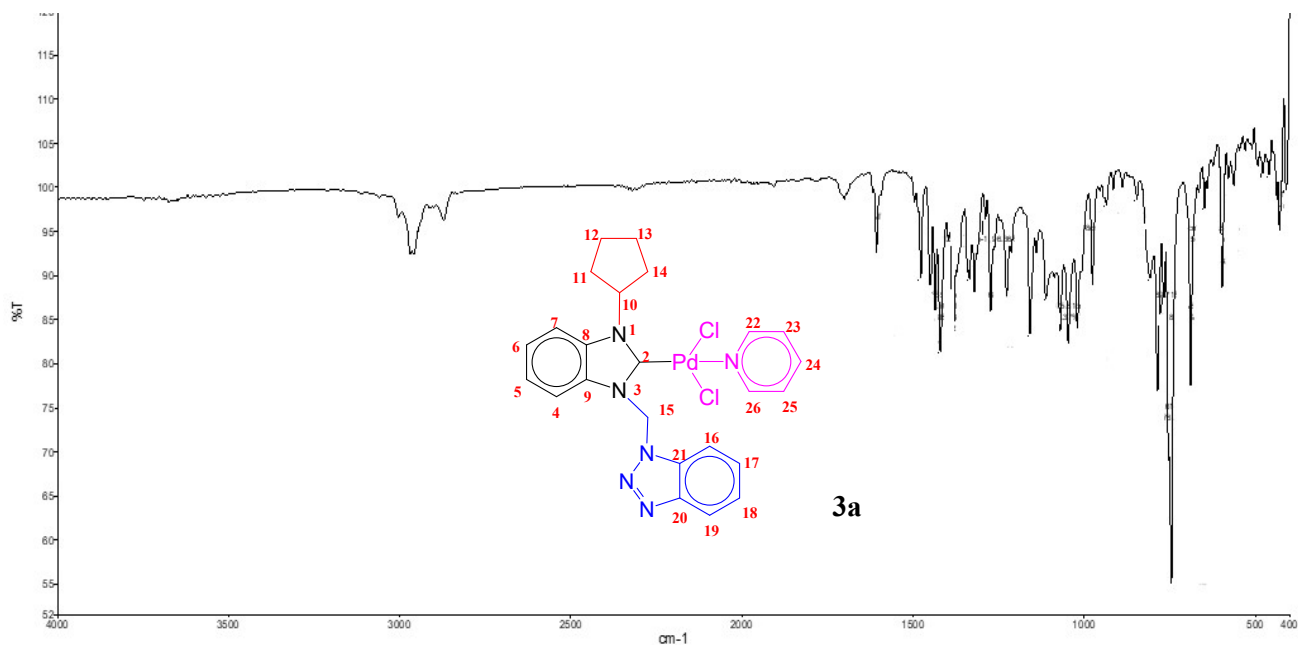

**Figure 19:** IR spectra of Dichloro[1-cyclopentyl-3-(1-methylbenzo-1,2,3-triazolyl) benzimidazole-2-ylidene] pyridine palladium(II) (3a)

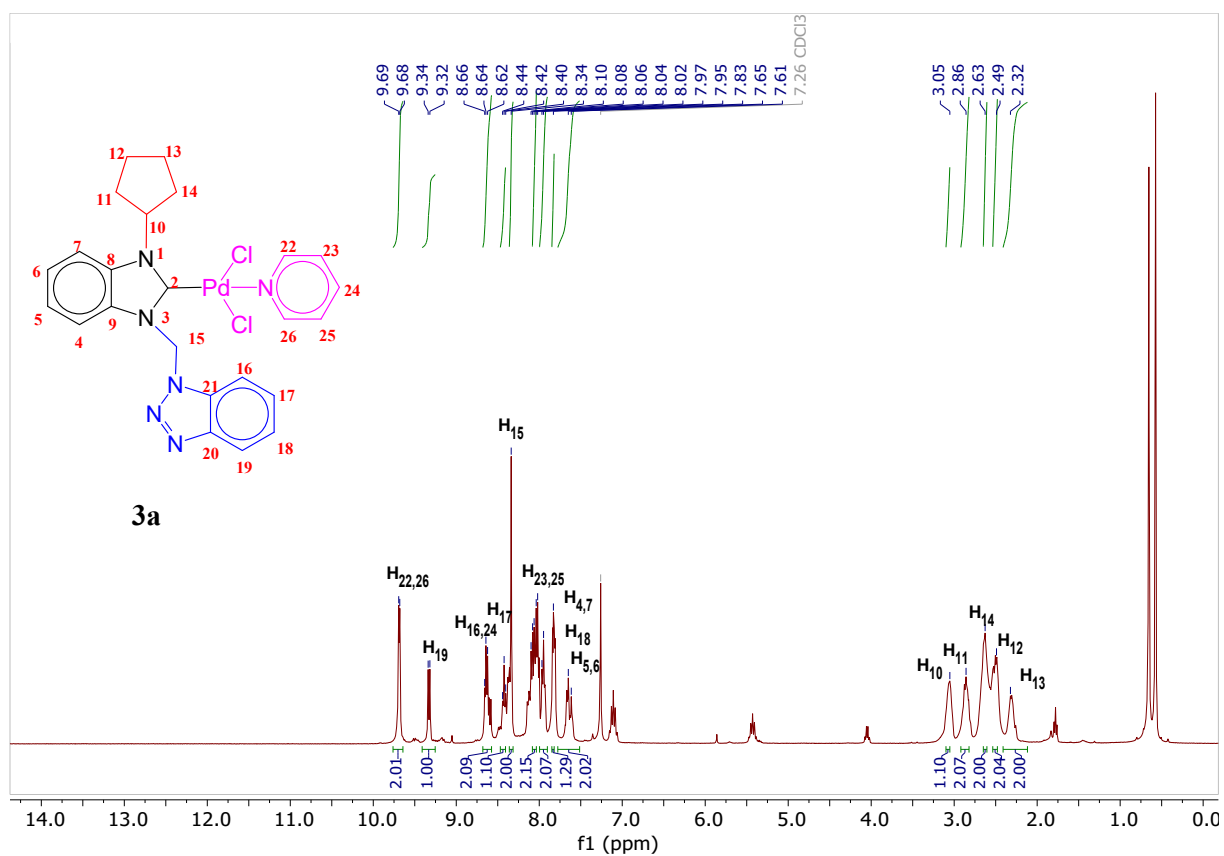

**Figure 20:**  $^1\text{H}$  NMR spectra of Dichloro[1-cyclopentyl-3-(1-methylbenzo-1,2,3-triazolyl) benzimidazole-2-ylidene] pyridine palladium(II) (3a)

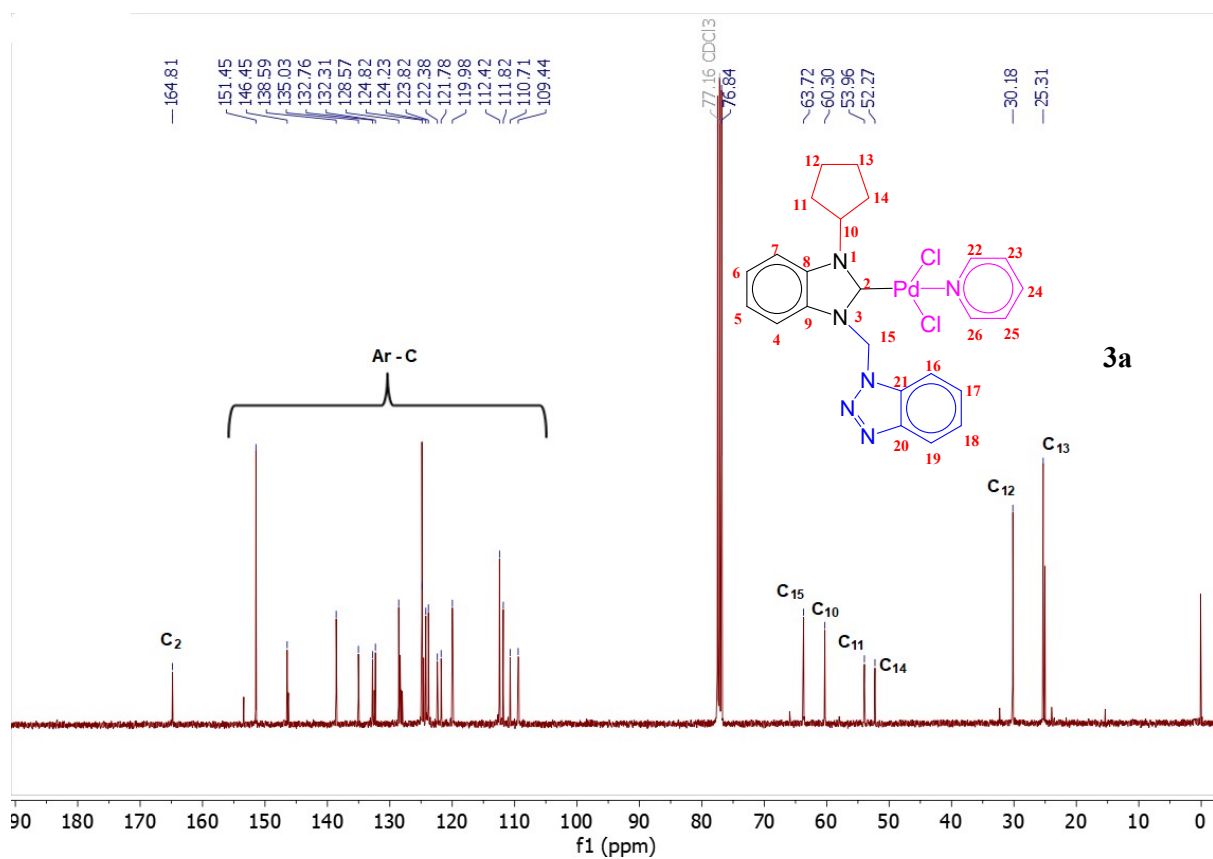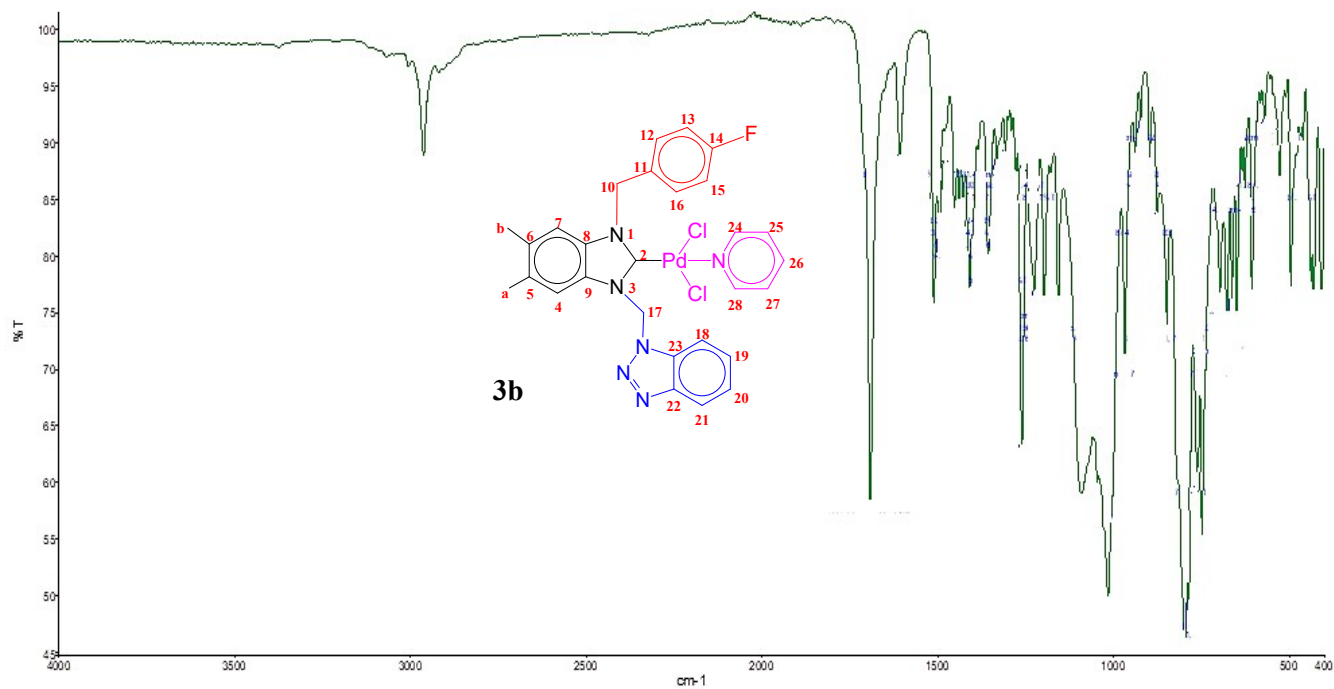

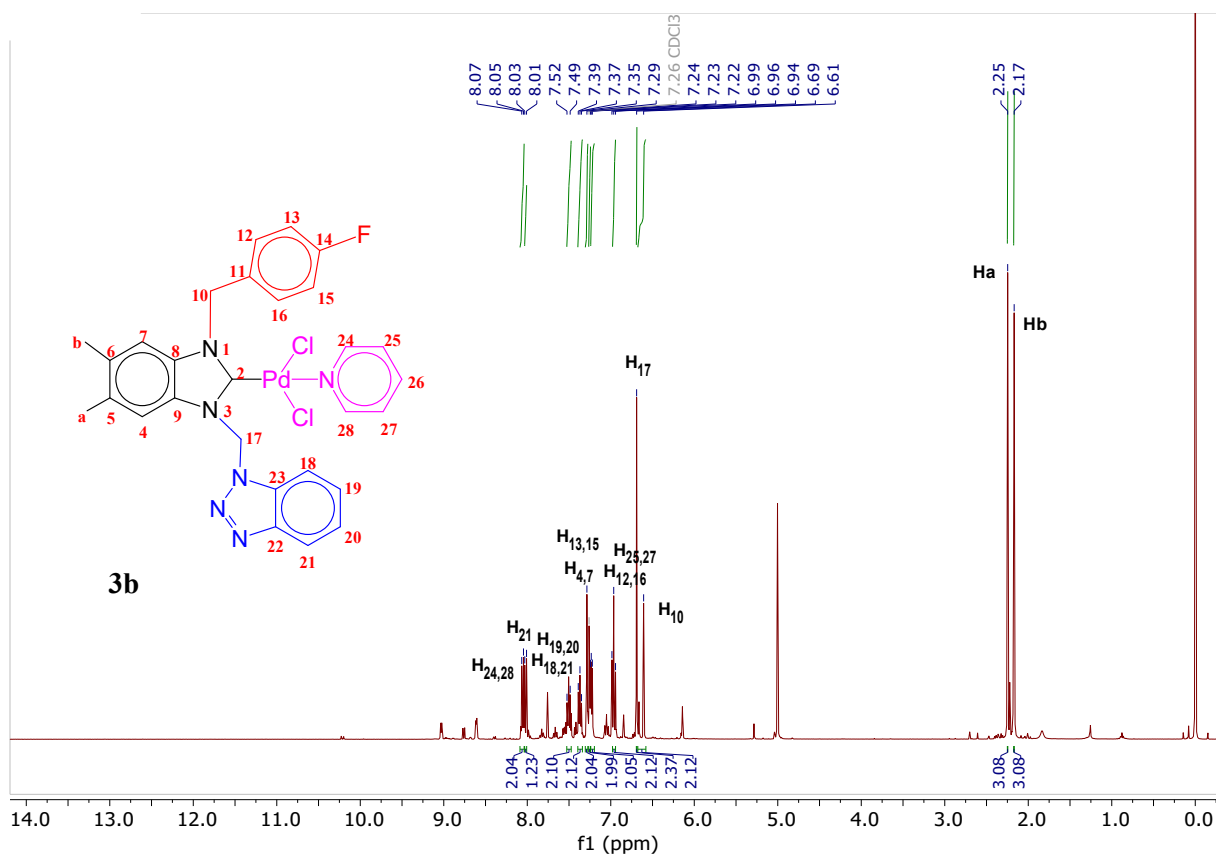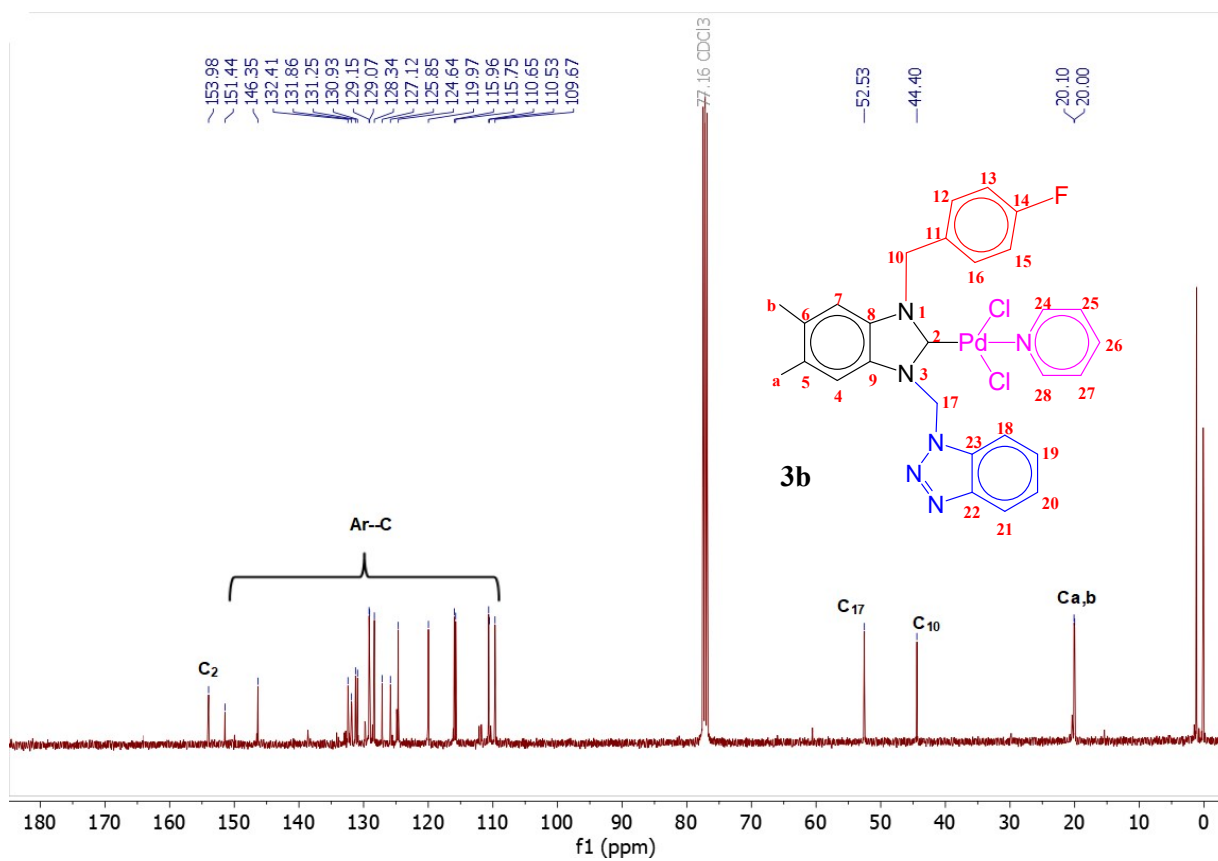

**Figure 24 :**  $^{13}\text{C}$ NMR spectra of Dichloro[1-(4-fluorobenzyl)-3-(1-methylbenzo-1,2,3-triazolyl)-5,6-dimethyl benzimidazole-2-ylidene] pyridine palladium (3b)

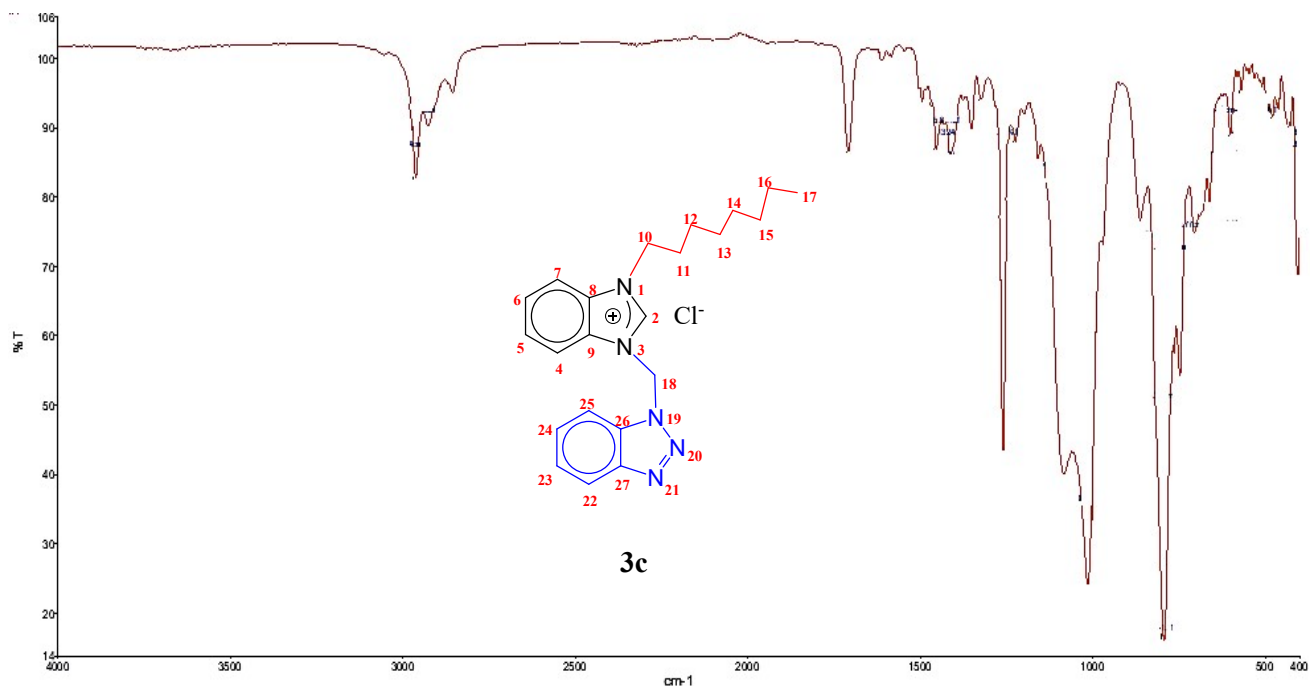

**Figure 25:** IR spectra of Dichloro[1-octyl-3-(1-methylbenzo-1,2,3-triazolyl) benzimidazole-2-ylidene] pyridine palladium(II) (3c)

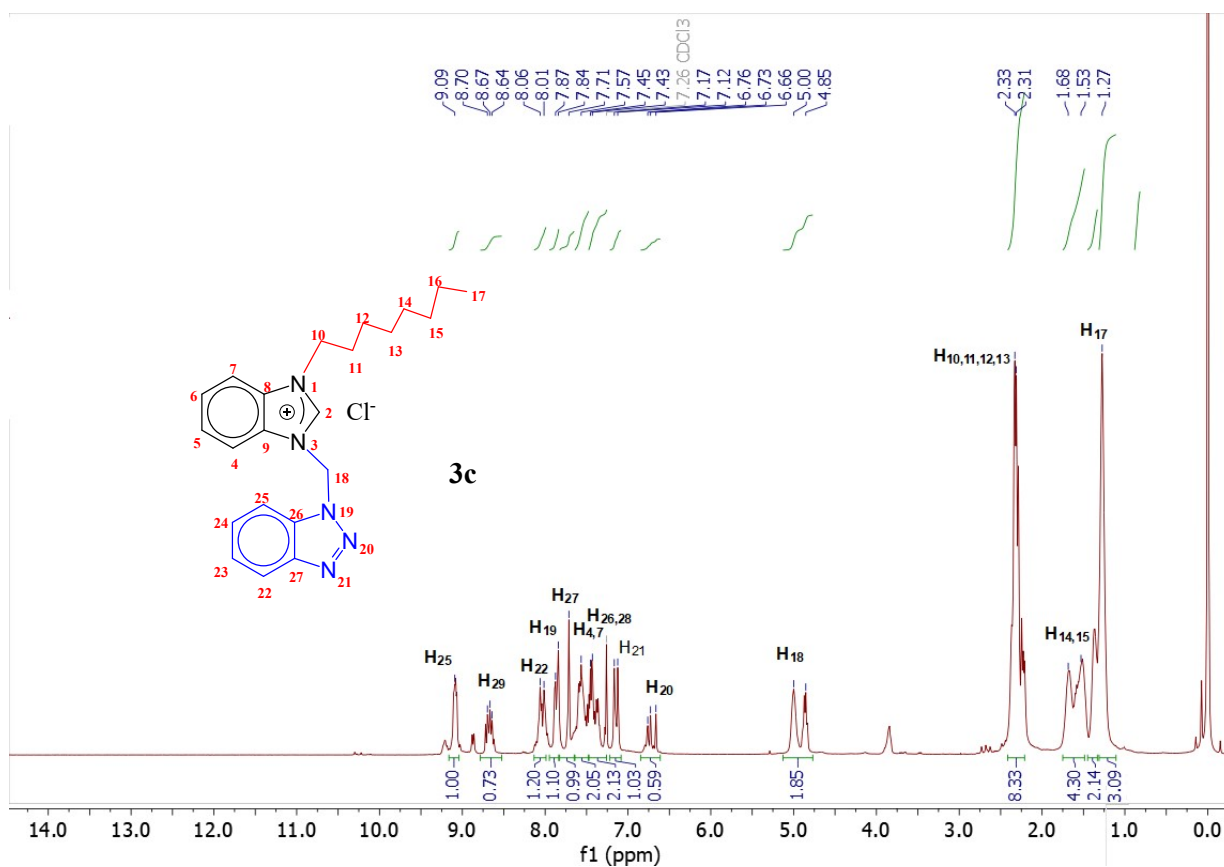

**Figure 26 :**  $^1\text{H}$  NMR spectra of Dichloro[1-octyl-3-(1-methylbenzo-1,2,3-triazolyl) benzimidazole-2-ylidene] pyridine palladium(II) (3c)

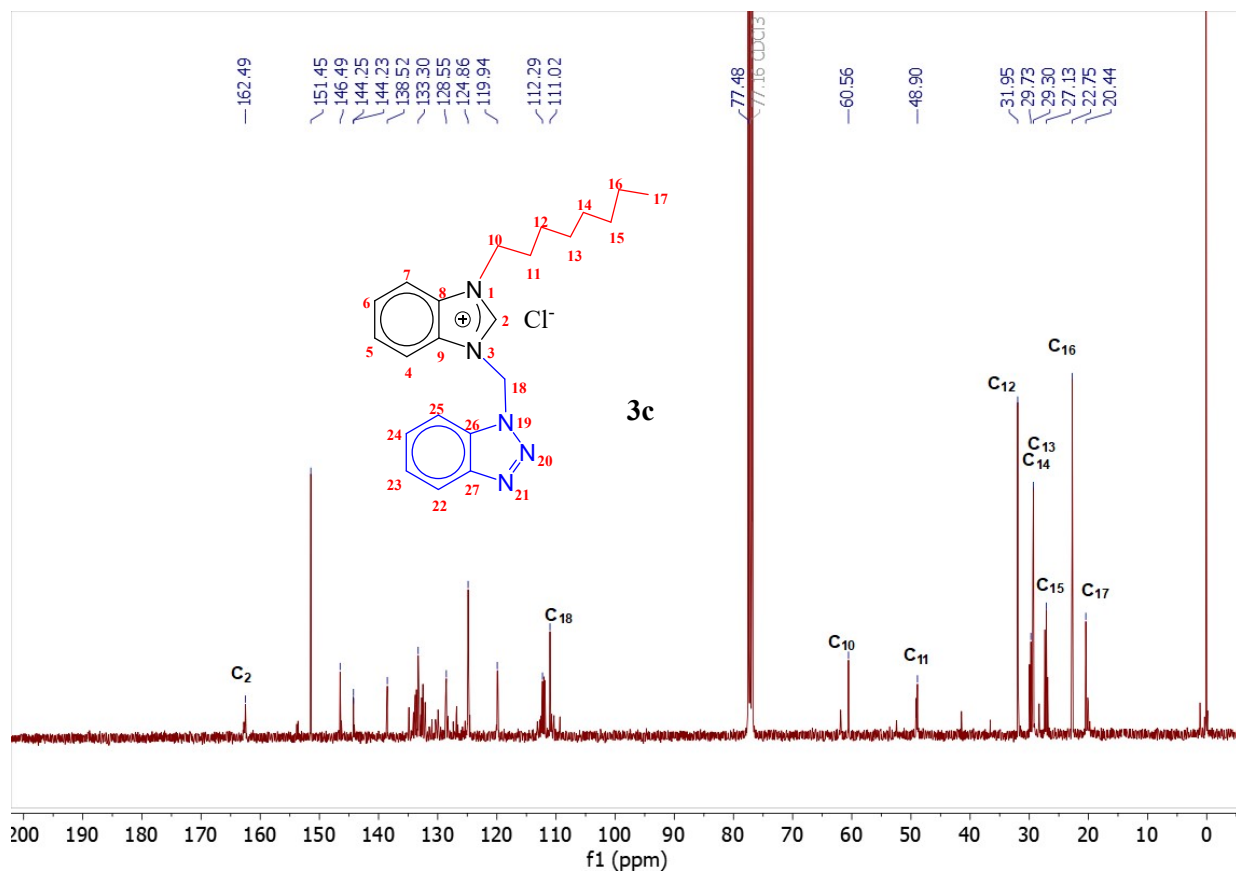

**Figure 27 :**  $^{13}\text{C}$  NMR spectra of Dichloro[1-octyl-3-(1-methylbenzo-1,2,3-triazolyl) benzimidazole-2-ylidene] pyridine palladium(II) (3c).

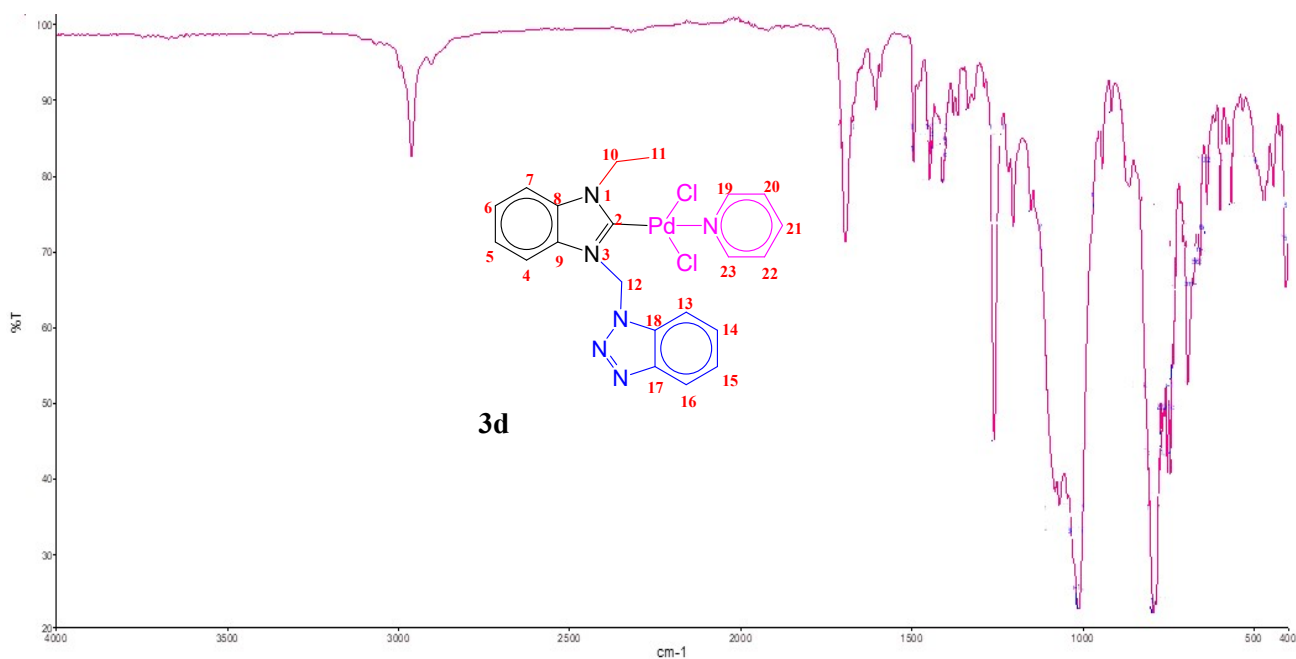

**Figure 28:** IR spectra of Dichloro[1-Ethyl-3-(1-methylbenzo-1,2,3-triazolyl)benzimidazole-2-ylidene] pyridine palladium(II) (3d)

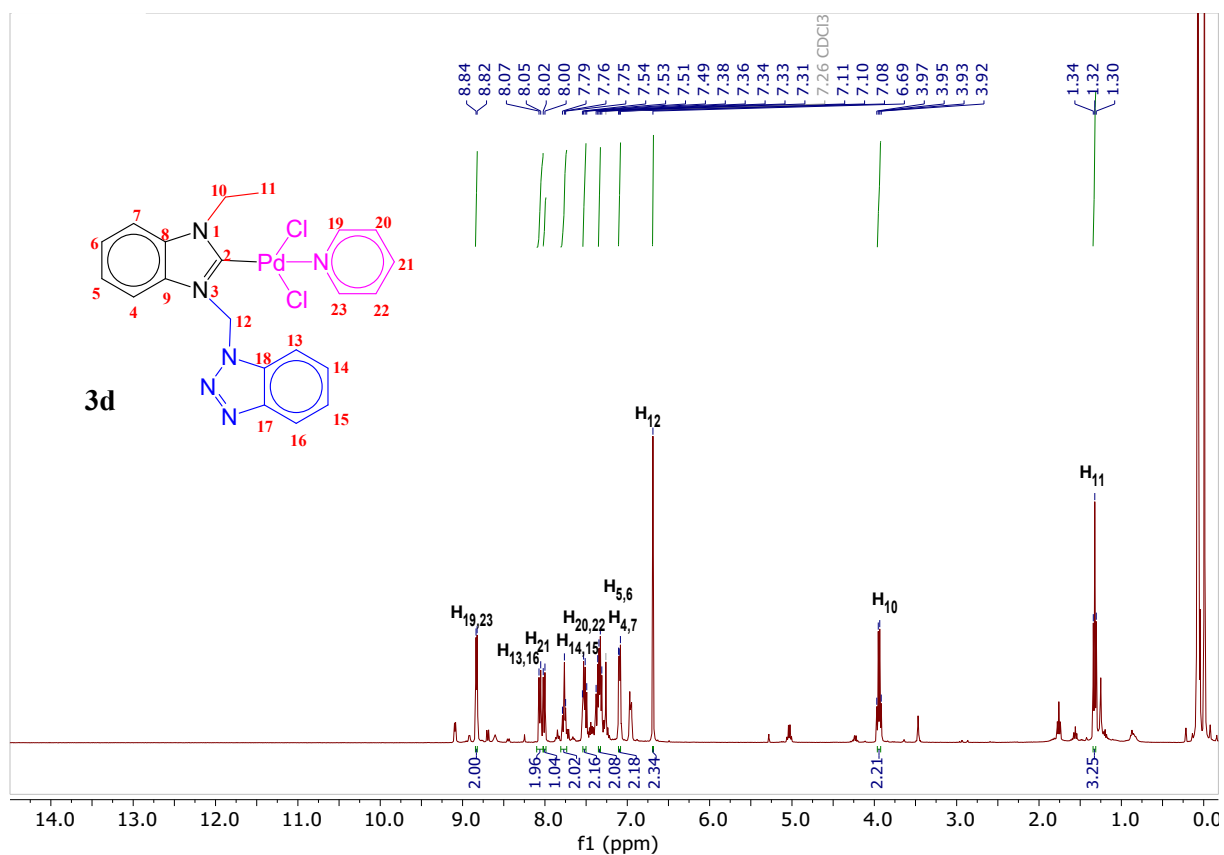

**Figure 29 :** <sup>1</sup>H NMR spectra of Dichloro[1-Ethyl-3-(1-methylbenzo-1,2,3-triazolyl)benzimidazole-2-ylidene] pyridine palladium(II) (3d)

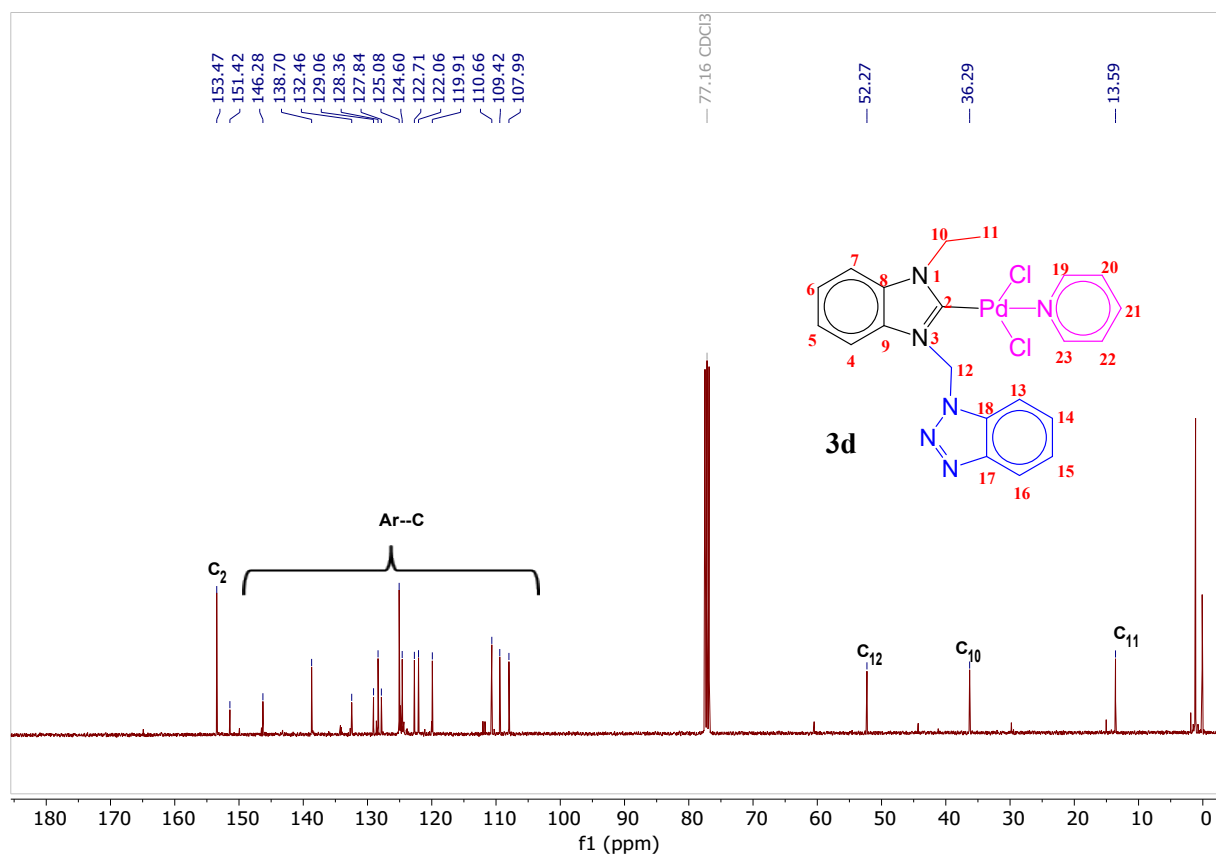

**Figure 30 :**  $^{13}\text{C}$  NMR spectra of Dichloro[1-Ethyl-3-(1-methylbenzo-1,2,3-triazolyl)benzimidazole-2-ylidene] pyridine palladium(II) (3d)

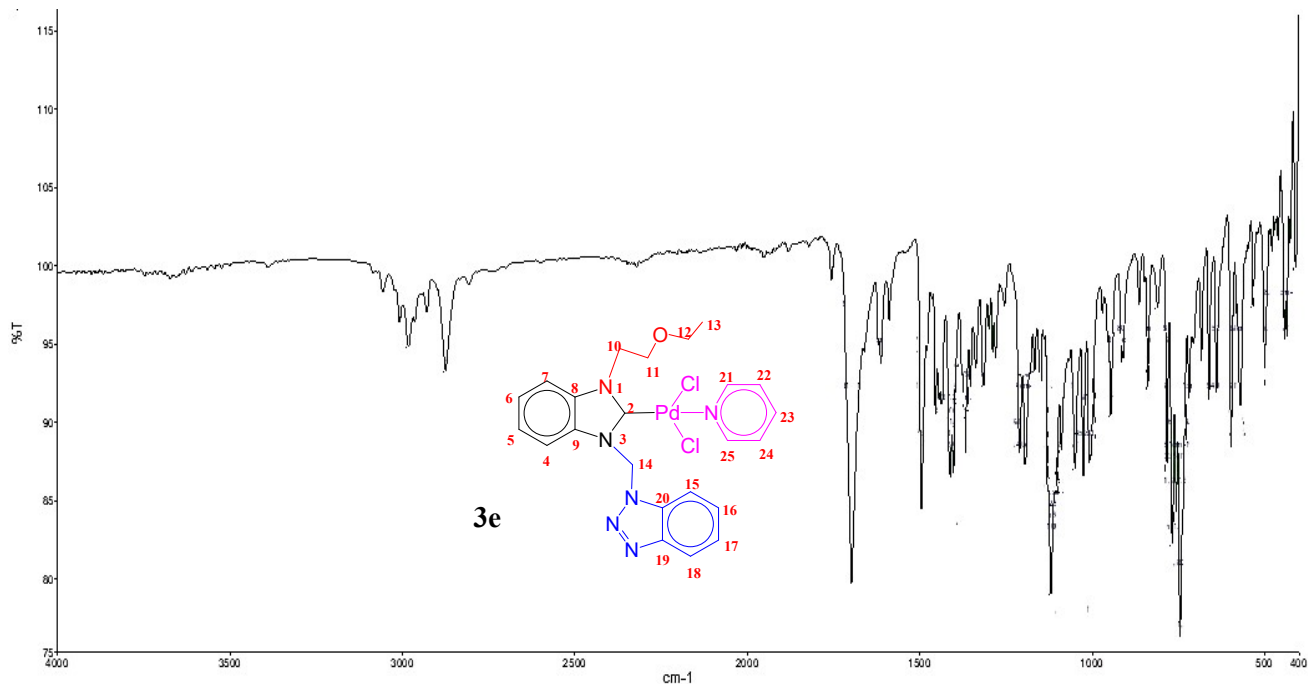

**Figure 31:** IR spectra of Dichloro[1-(2-ethoxyethyl)-3-(1-methylbenzo-1,2,3-triazolyl)benzimidazole-2-ylidene] pyridine palladium(II) (3e)

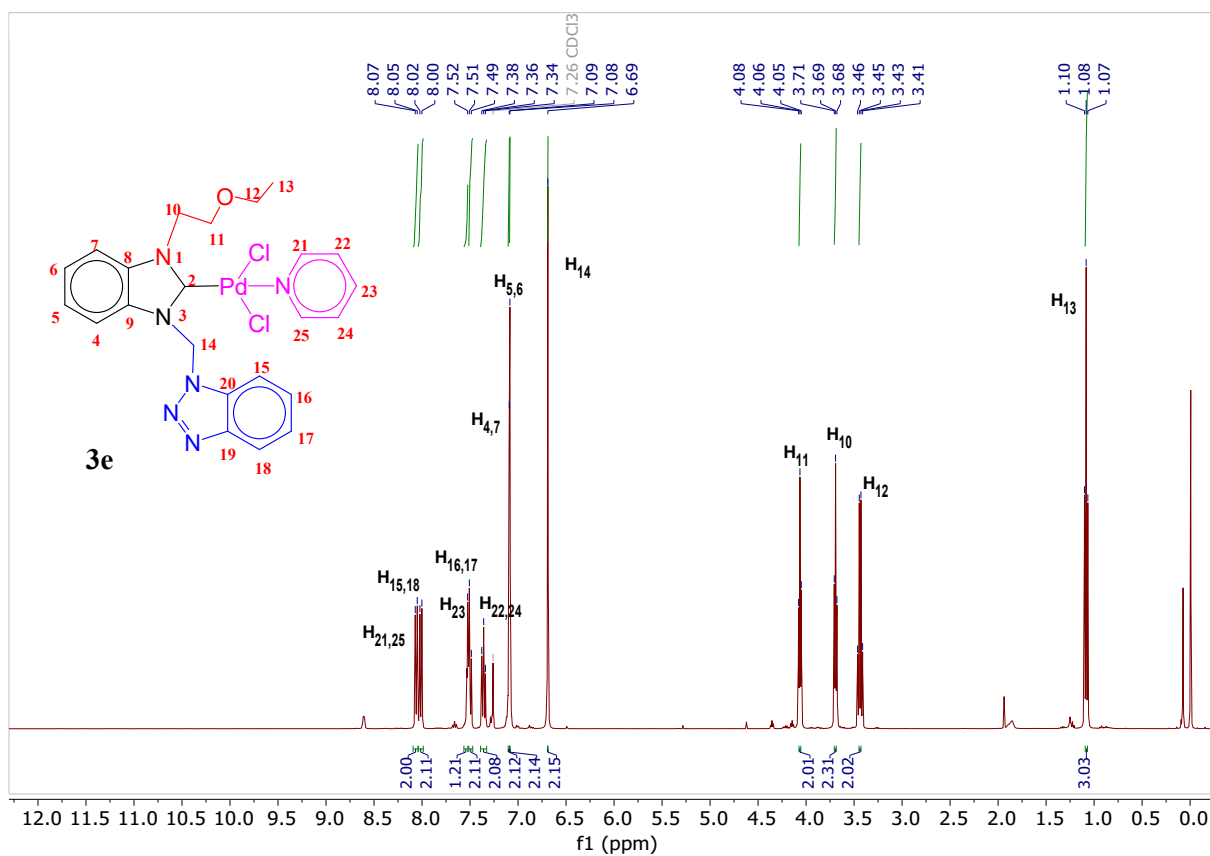

**Figure 32 :**  $^1\text{H}$  NMR spectra of Dichloro[1-(2-ethoxyethyl)-3-(1-methylbenzo-1,2,3-triazolyl)benzimidazole-2-ylidene] pyridine palladium(II) (3e)

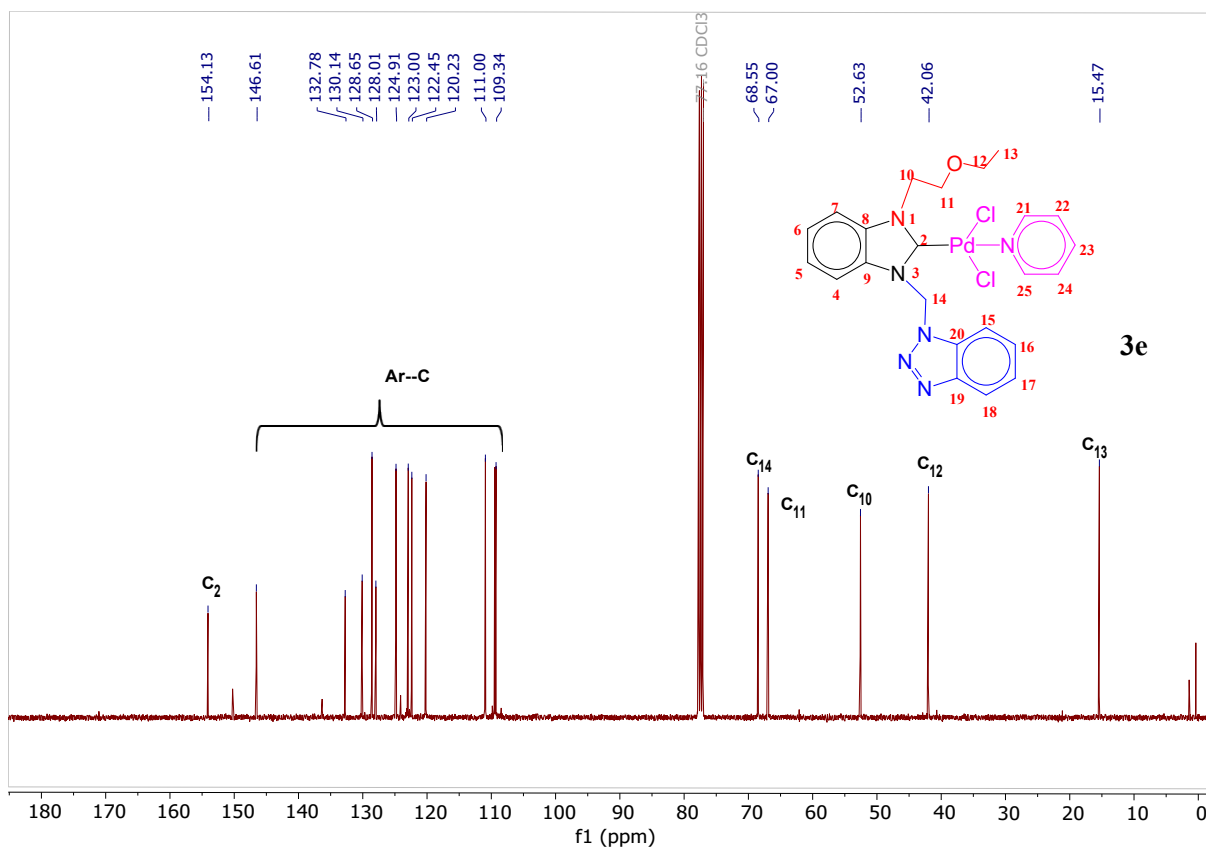

**Figure 33 :**  $^{13}\text{C}$  NMR spectra of Dichloro[1-(2-ethoxyethyl)-3-(1-methylbenzo-1,2,3-triazolyl)benzimidazole-2-ylidene] pyridine palladium(II) (3e).

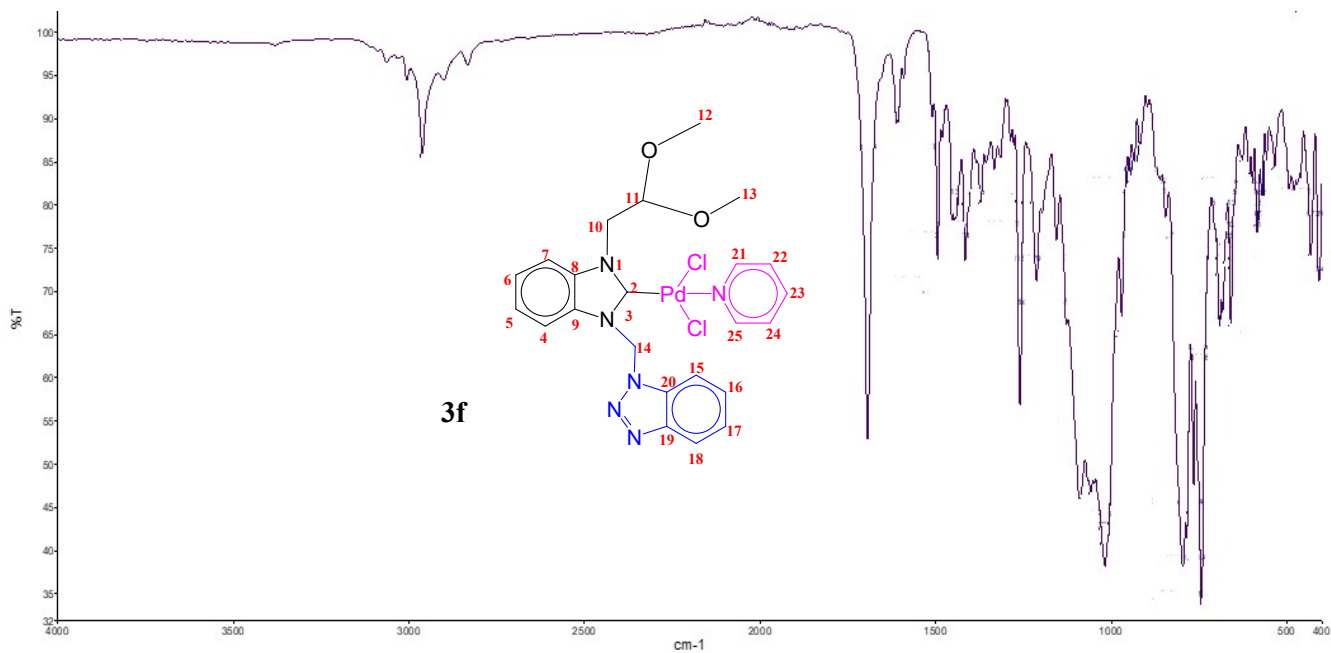

**Figure 34:** IR spectra of Dichloro[1-(2,2-dimethoxyethyl)-3-(1-methylbenzo-1,2,3-triazolyl)benzimidazole-2-ylidene] pyridine palladium(II) (3f).

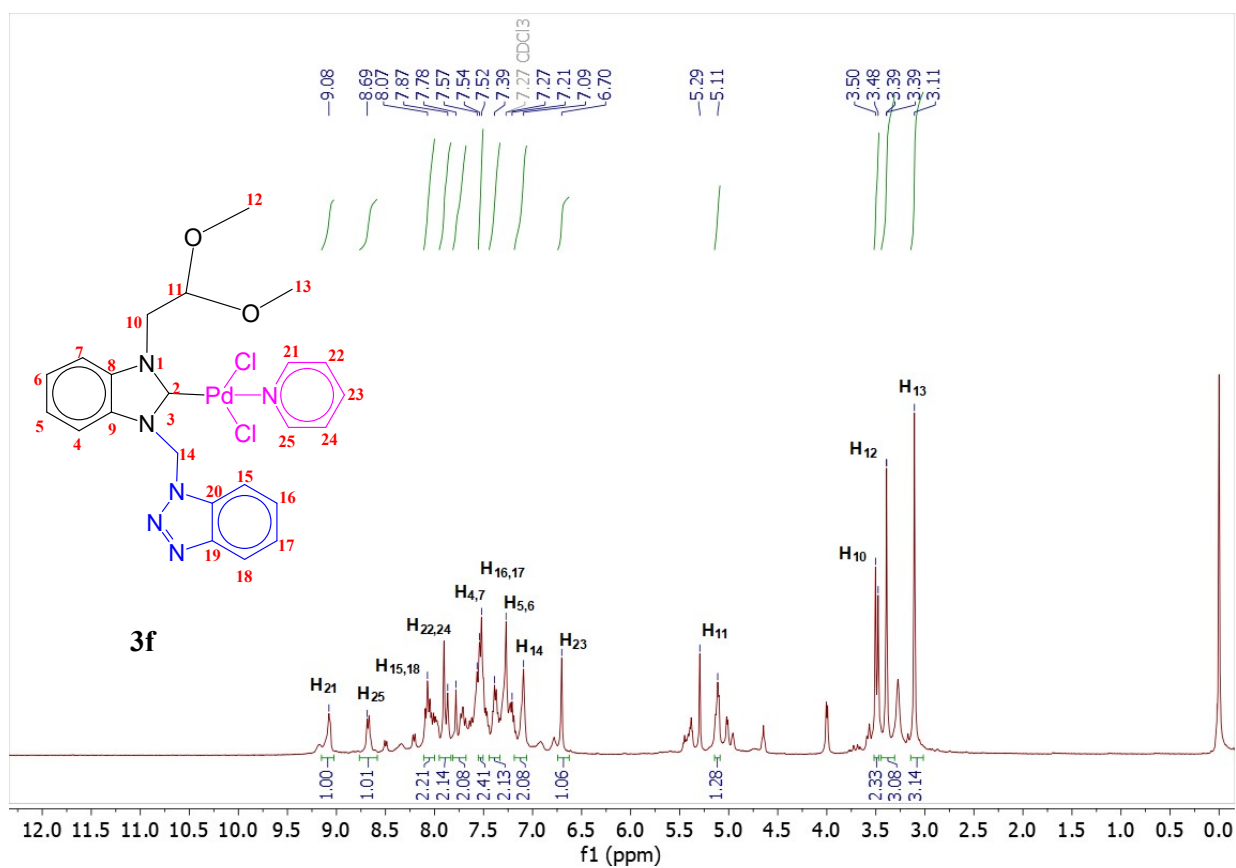

**Figure 35** :  $^1\text{H}$  NMR spectra of Dichloro[1-(2,2-dimethoxyethyl)-3-(1-methylbenzo-1,2,3-triazoly)benzimidazole-2-ylidene] pyridine palladium(II) (**3f**).

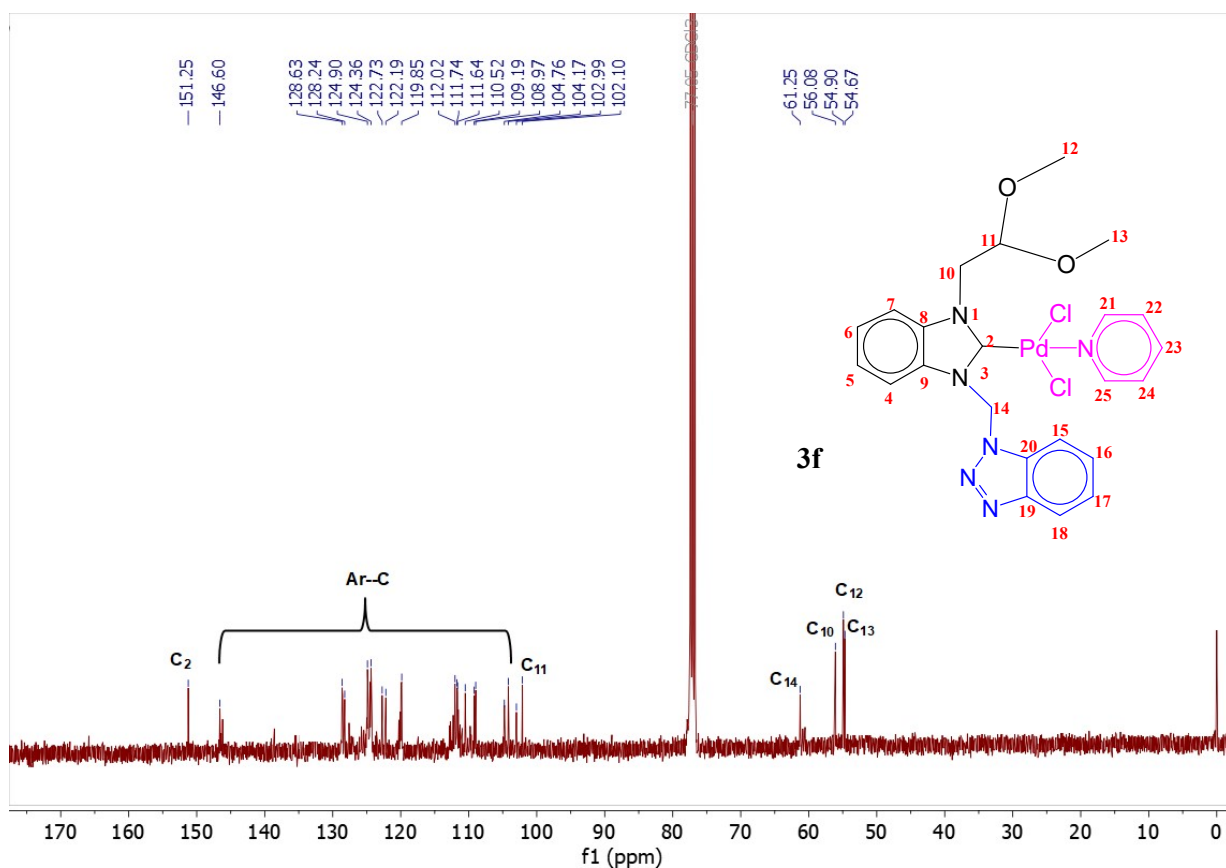

**Figure 36 :**  $^{13}\text{C}$ NMR spectra of Dichloro[1-(2,2-dimethoxyethyl)-3-(1-methylbenzo-1,2,3-triazoly)benzimidazole-2-ylidene] pyridine palladium(II) (3f).

**Table S1.** Crystallographic data and structure refinement for the title compound

|                                               |                                                                      |
|-----------------------------------------------|----------------------------------------------------------------------|
| <i>chemical formula</i>                       | $\text{C}_{23}\text{H}_{24}\text{Cl}_2\text{N}_6\text{O}_2\text{Pd}$ |
| <i>formula weight (g·mol<sup>-1</sup>)</i>    | 593.78                                                               |
| <i>T (K) / crystal size (mm<sup>3</sup>)</i>  | 100(2) / 0.356 x 0.302 x 0.242                                       |
| <i>crystal system / space group</i>           | Monoclinic / $P2_1/n$                                                |
| <i>Cell</i>                                   |                                                                      |
| <i>a (Å)</i>                                  | 13.4331(8)                                                           |
| <i>b (Å)</i>                                  | 12.7371(7)                                                           |
| <i>c (Å)</i>                                  | 15.3320(11)                                                          |
| <i>α (°)</i>                                  | 90                                                                   |
| <i>β (°)</i>                                  | 111.330(2)                                                           |
| <i>γ (°)</i>                                  | 90                                                                   |
| <i>V (Å<sup>3</sup>) / Z</i>                  | 2443.6(3) / 4                                                        |
| <i>density calculated (Mg·m<sup>-3</sup>)</i> | 1.614                                                                |

|                                                  |                                                 |
|--------------------------------------------------|-------------------------------------------------|
| <i>absorption coefficient (mm<sup>-1</sup>)</i>  | <i>1.011</i>                                    |
| <i>F(000)</i>                                    | <i>1200</i>                                     |
| <i>θ range (°) for data collection</i>           | <i>2.142- 30.508</i>                            |
| <i>index range</i>                               | <i>-19 ≤ h ≤ 19, -18 ≤ k ≤ 18, -21 ≤ l ≤ 21</i> |
| <i>reflections collected</i>                     | <i>72237</i>                                    |
| <i>independent reflections / R<sub>int</sub></i> | <i>7458 / 0.0508</i>                            |
| <i>goodness-of-fit on F<sup>2</sup></i>          | <i>1.073</i>                                    |
| <i>final R indices [I &gt; 2σ(I)]</i>            | <i>R1 = 0.0282, wR2 = 0.0504</i>                |
| <i>CCDC</i>                                      |                                                 |

**Table S2.** Selected bond lengths of the title compound

| <b>Bonds lengths (Å)</b> | <b>exp.</b>     | <b>DFT calc.</b> |                  |               |
|--------------------------|-----------------|------------------|------------------|---------------|
|                          |                 | <b>B3LYP</b>     | <b>CAM-B3LYP</b> | <b>M06-2X</b> |
| <b>Pd(1)-C(1)</b>        | 1.9645(12)<br>) | 1.9876           | 1.977            | 1.9628        |
| <b>Pd(1)-N(1)</b>        | 2.0868(11)<br>) | 2.1799           | 2.1614           | 2.2104        |
| <b>Pd(1)-Cl(1)</b>       | 2.2817(3)       | 2.3828           | 2.3575           | 2.3876        |
| <b>Pd(1)-Cl(2)</b>       | 2.2997(4)       | 2.3833           | 2.3576           | 2.3909        |
| <b>C(1)-N(2)</b>         | 1.3466(15)<br>) | 1.3494           | 1.3408           | 1.3402        |
| <b>C(1)-N(3)</b>         | 1.3601(15)<br>) | 1.3569           | 1.3485           | 1.3481        |
| <b>N(2)-C(2)</b>         | 1.3941(16)<br>) | 1.3998           | 1.3959           | 1.3947        |
| <b>N(2)-C(13)</b>        | 1.4559(16)<br>) | 1.463            | 1.4563           | 1.457         |
| <b>C(13)-C(14)</b>       | 1.5184(18)<br>) | 1.5342           | 1.5255           | 1.5273        |
| <b>C(14)-O(1)</b>        | 1.3992(16)<br>) | 1.4058           | 1.3981           | 1.3962        |
| <b>C(14)-O(2)</b>        | 1.4021(15)<br>) | 1.4114           | 1.4024           | 1.3988        |
| <b>O(1)-C(15)</b>        | 1.4234(19)<br>) | 1.4289           | 1.4203           | 1.4202        |
| <b>O(2)-C(16)</b>        | 1.4246(19)<br>) | 1.4275           | 1.4188           | 1.4179        |
| <b>C(2)-C(3)</b>         | 1.3873(17)<br>) | 1.3915           | 1.3865           | 1.3894        |
| <b>C(2)-C(7)</b>         | 1.3884(17)<br>) | 1.3998           | 1.3909           | 1.3944        |
| <b>C(3)-C(4)</b>         | 1.3871(18)<br>) | 1.3914           | 1.3846           | 1.387         |
| <b>C(4)-C(5)</b>         | 1.4102(19)<br>) | 1.4034           | 1.399            | 1.4029        |
| <b>C(5)-C(6)</b>         | 1.3871(19)<br>) | 1.3918           | 1.385            | 1.3875        |

|                    |                |        |        |        |
|--------------------|----------------|--------|--------|--------|
| <b>C(6)-C(7)</b>   | 1.3918(17<br>) | 1.3931 | 1.3883 | 1.3915 |
| <b>C(7)-N(3)</b>   | 1.3944(16<br>) | 1.4011 | 1.3972 | 1.3952 |
| <b>N(1)-C(8)</b>   | 1.3323(18<br>) | 1.3446 | 1.3387 | 1.3401 |
| <b>N(1)-C(12)</b>  | 1.3343(18<br>) | 1.3444 | 1.3386 | 1.3398 |
| <b>C(8)-C(9)</b>   | 1.382(2)       | 1.3893 | 1.3834 | 1.3875 |
| <b>C(9)-C(10)</b>  | 1.393(3)       | 1.3911 | 1.3853 | 1.3882 |
| <b>C(10)-C(11)</b> | 1.385(2)       | 1.391  | 1.3852 | 1.388  |
| <b>C(11)-C(12)</b> | 1.384(2)       | 1.3893 | 1.3835 | 1.3876 |
| <b>N(3)-C(17)</b>  | 1.4519(16<br>) | 1.4606 | 1.4528 | 1.4537 |
| <b>C(17)-N(4)</b>  | 1.4456(16<br>) | 1.4447 | 1.439  | 1.4389 |
| <b>N(4)-C(18)</b>  | 1.3626(16<br>) | 1.3724 | 1.3582 | 1.3553 |
| <b>N(4)-N(5)</b>   | 1.3640(15<br>) | 1.372  | 1.3668 | 1.3649 |
| <b>N(5)-N(6)</b>   | 1.2929(17<br>) | 1.2834 | 1.275  | 1.2755 |
| <b>N(6)-C(19)</b>  | 1.3794(18<br>) | 1.3801 | 1.3765 | 1.38   |
| <b>C(18)-C(19)</b> | 1.3964(18<br>) | 1.4072 | 1.3964 | 1.3985 |
| <b>C(18)-C(23)</b> | 1.3985(18<br>) | 1.4007 | 1.3978 | 1.3999 |
| <b>C(19)-C(20)</b> | 1.3982(19<br>) | 1.4017 | 1.3984 | 1.4014 |
| <b>C(20)-C(21)</b> | 1.381(2)       | 1.3831 | 1.3752 | 1.3785 |
| <b>C(21)-C(22)</b> | 1.418(2)       | 1.4146 | 1.4119 | 1.4154 |
| <b>C(22)-C(23)</b> | 1.3765(19<br>) | 1.3856 | 1.3772 | 1.3798 |
